# Supplementary material for: Comprehensive Characterization of Mesenchymal Stem Cells from Human Placenta and Fetal Membrane and Their Response to Osteoactivin Stimulation
Source: Hindawi journal article supplement (doi:10.1155/2012/658356), 2012-01-01
Supplement: f1 [file 658356.f1.pdf]

# Supplementary Figure 1: Workflow of MSCs isolation

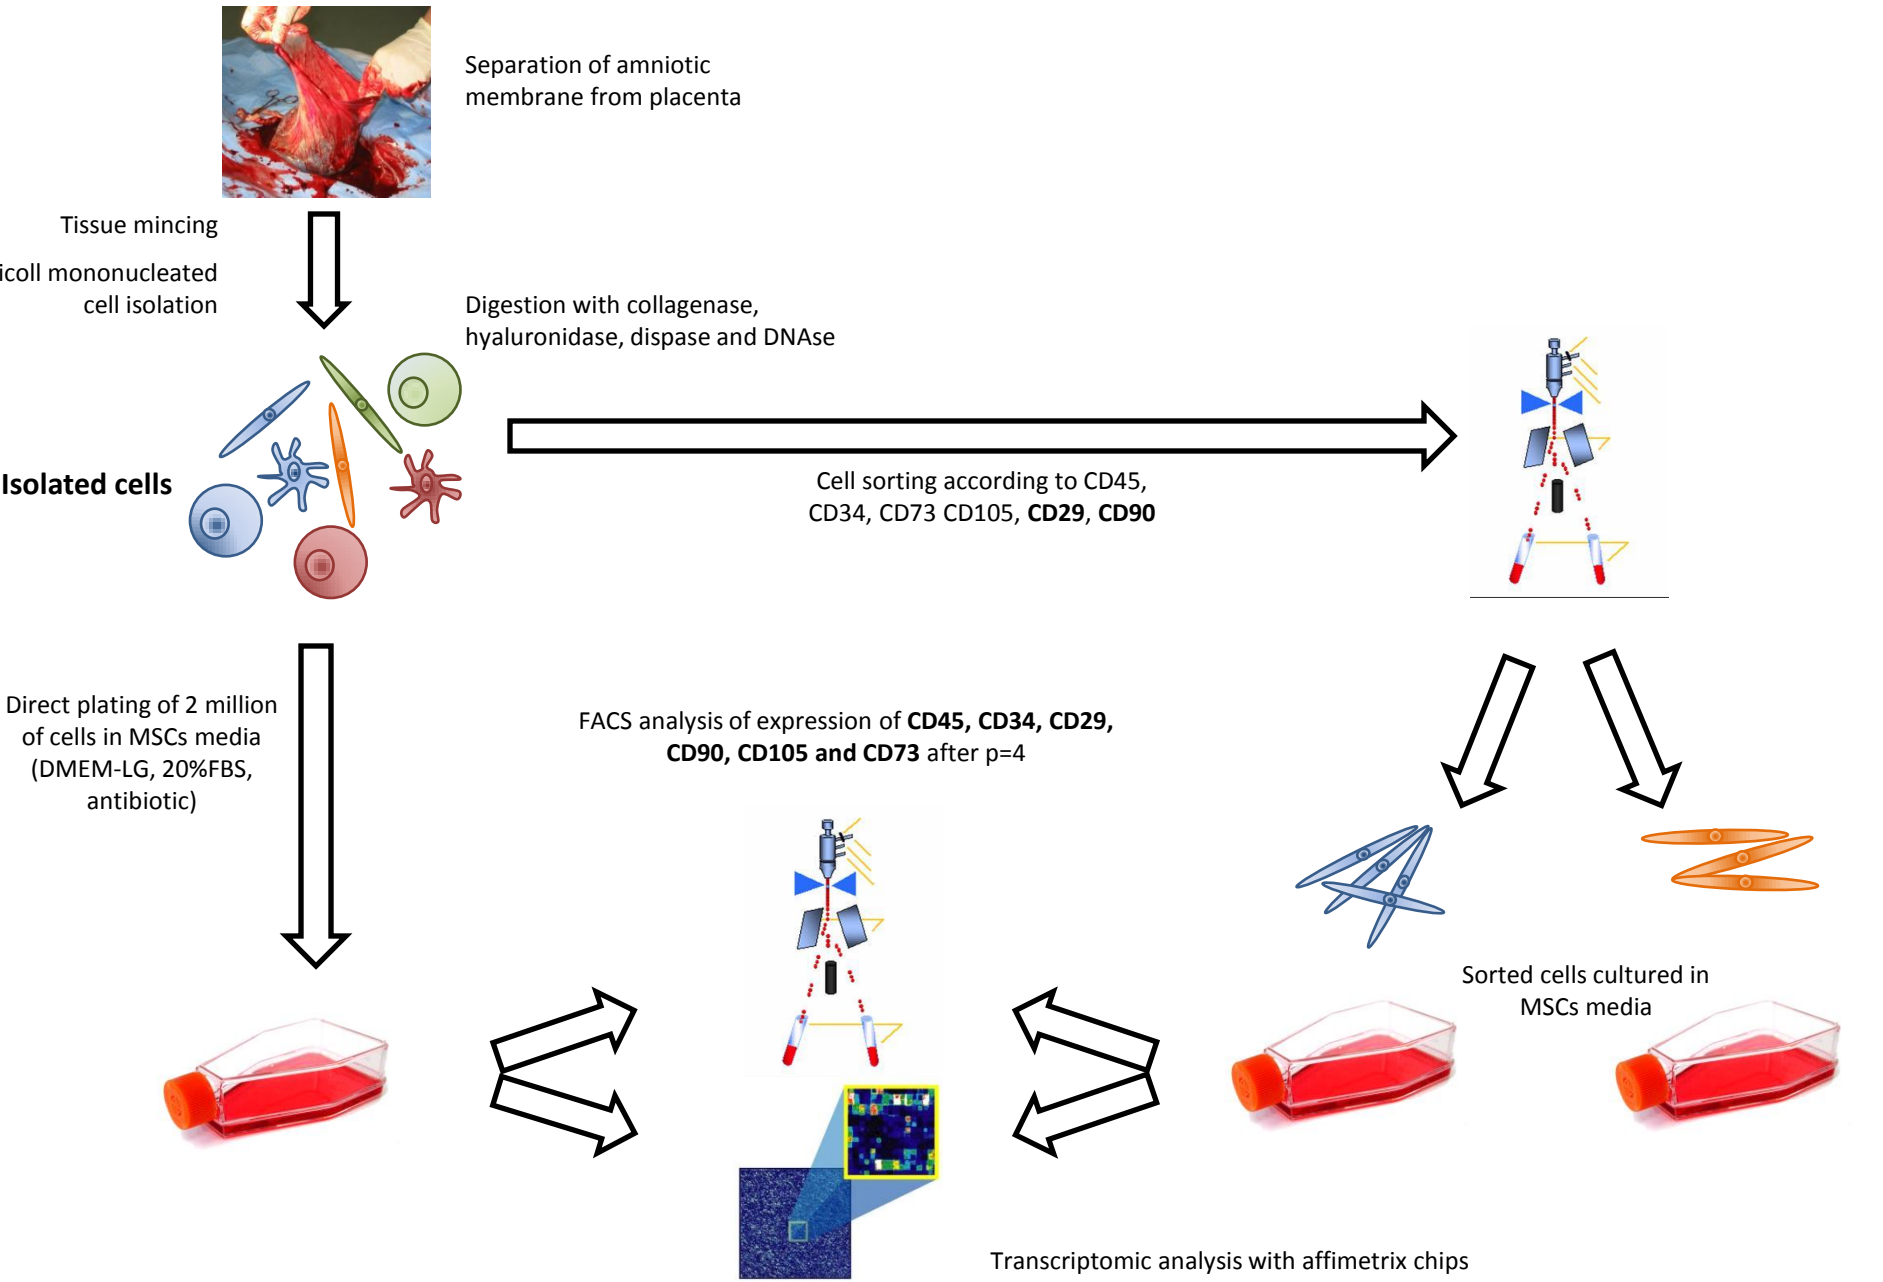

**Supplementary Figure 2: Comprehensive analysis of MSCs markers on freshly isolated cells from the amniotic membrane.**

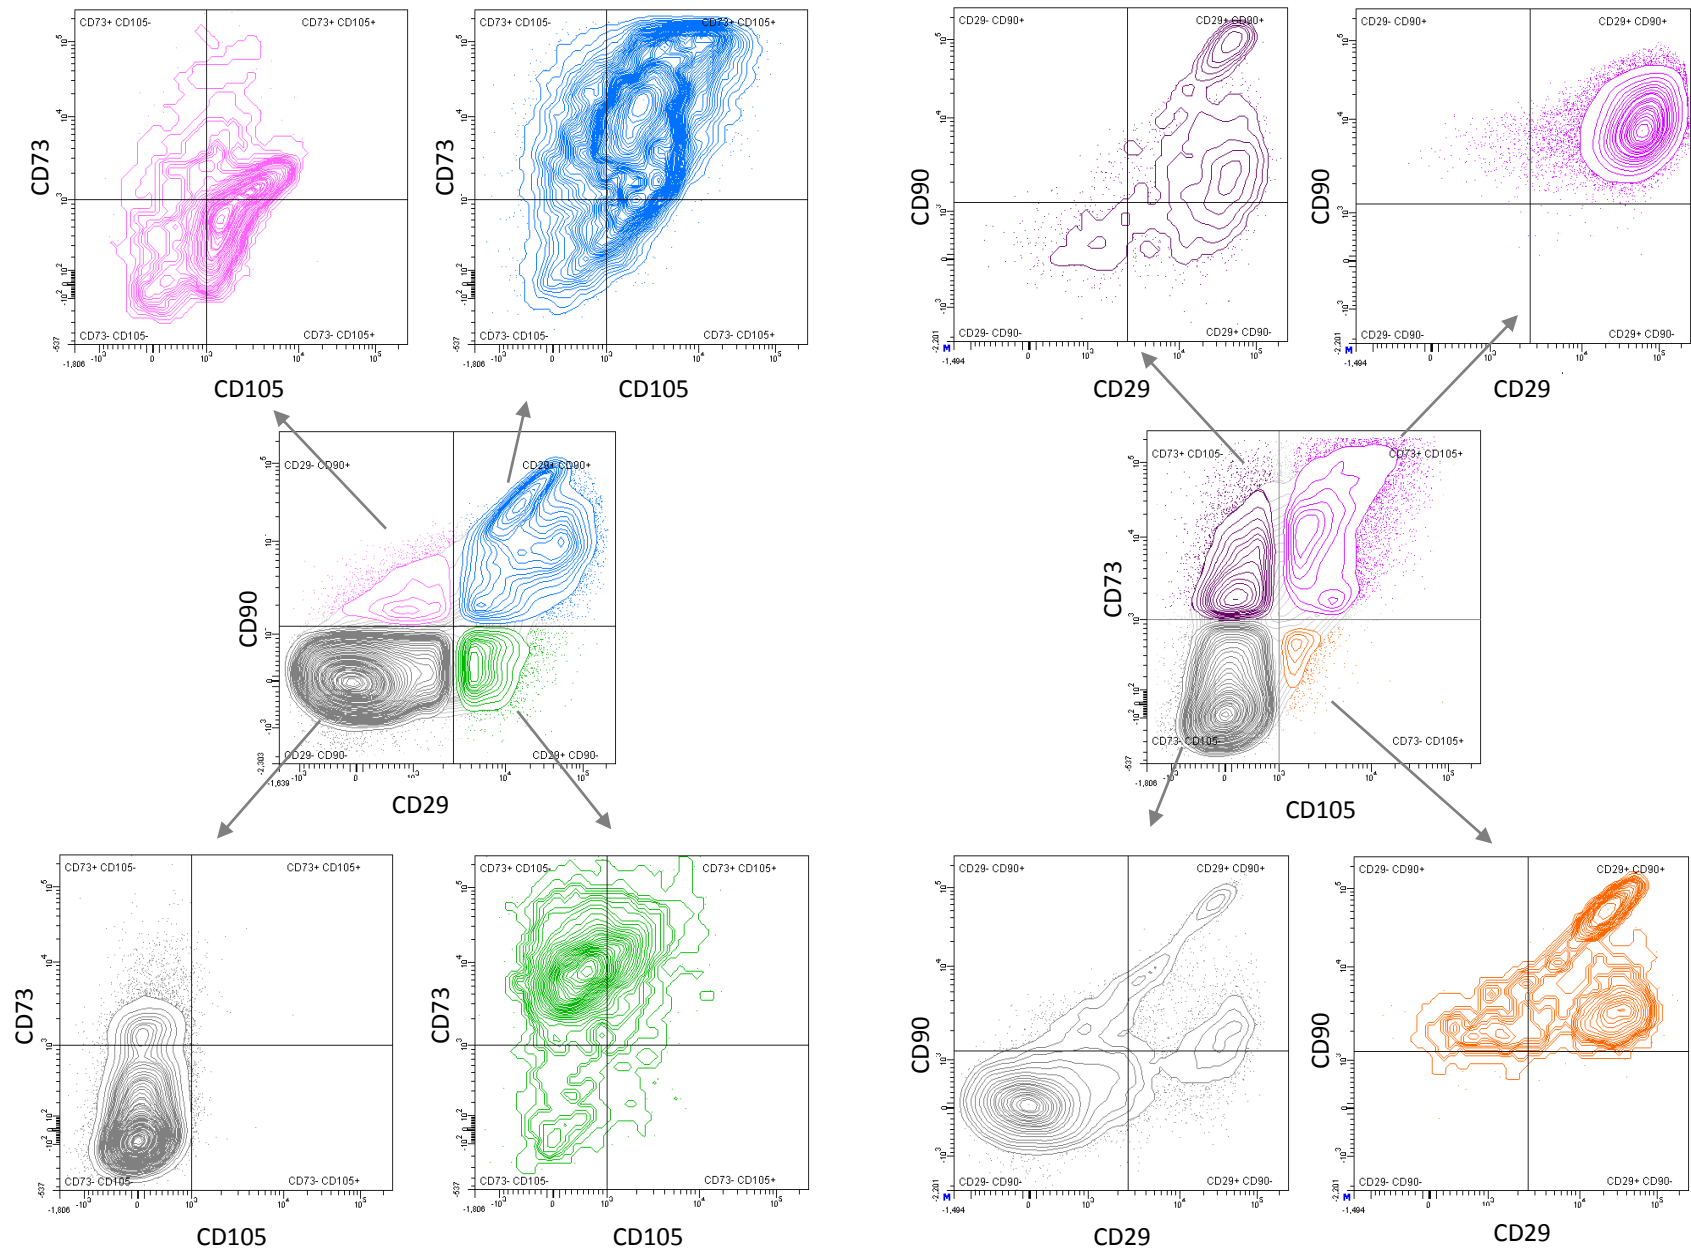

Supplementary Figure 3: PI/Mb-MSCs constitute a very homogenous population after 4 passages

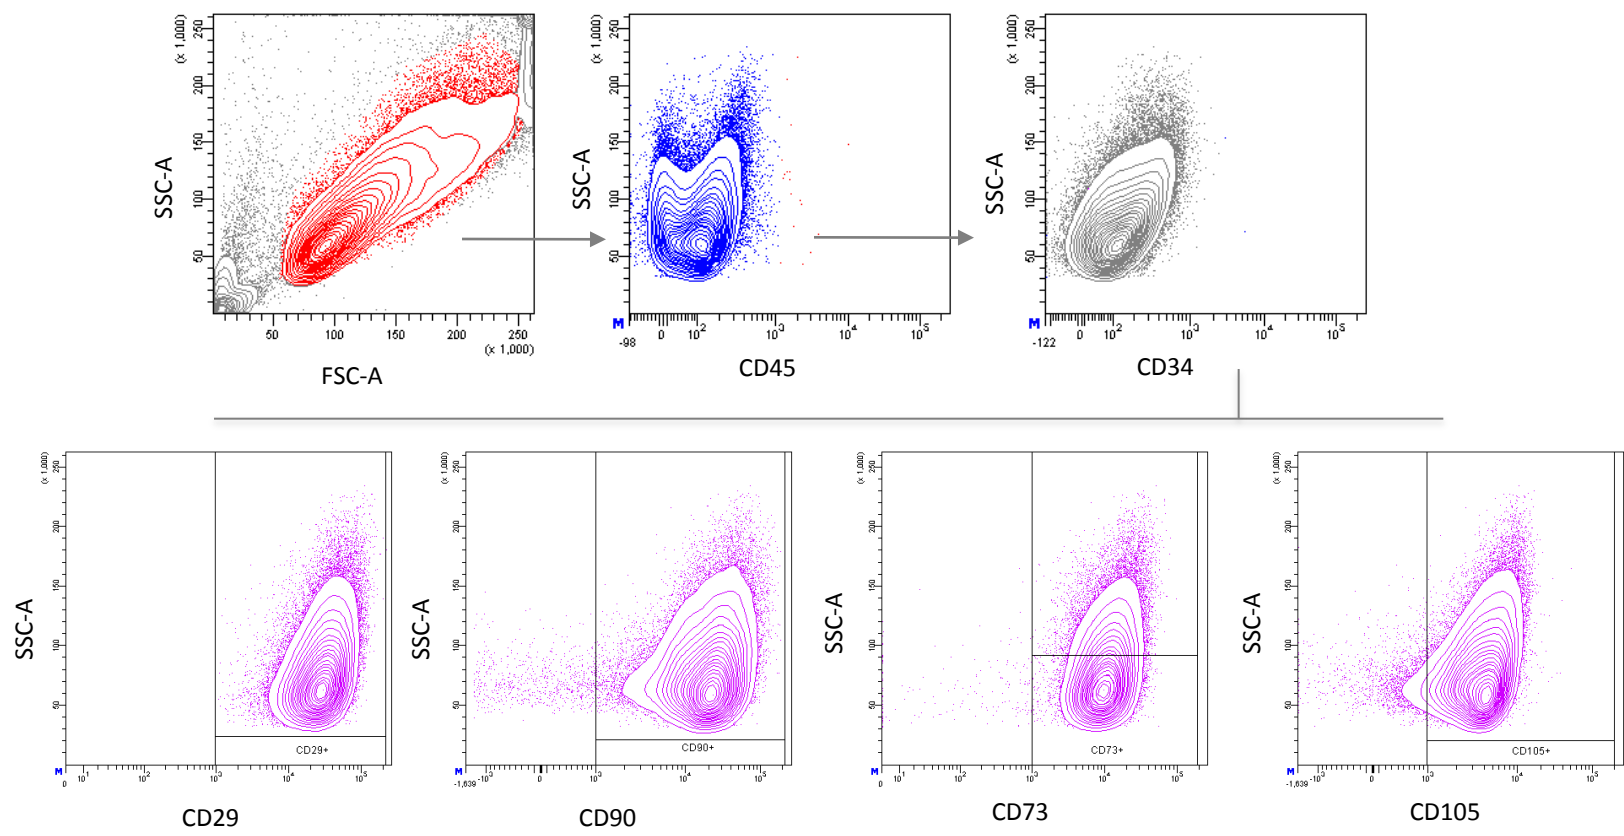

**Supplementary Figure 4: Immunofluorescence staining of placenta and membrane derived MSCs.**

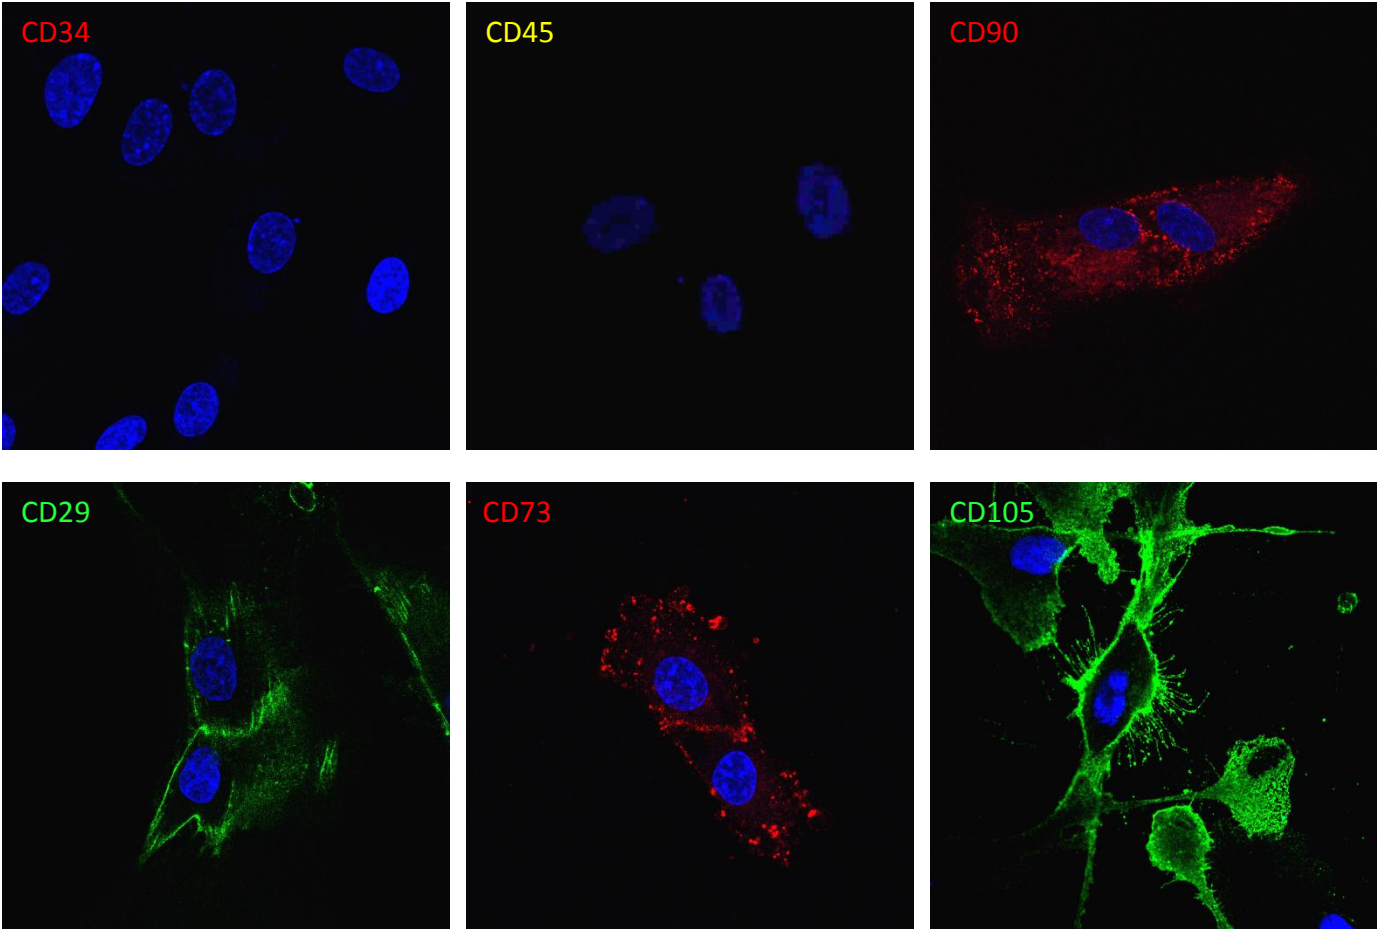

**Supplementary Figure 5: Venn analysis of genes up and down regulated in PI/Mb-MSCs as compared to BM-MSCs.**

A

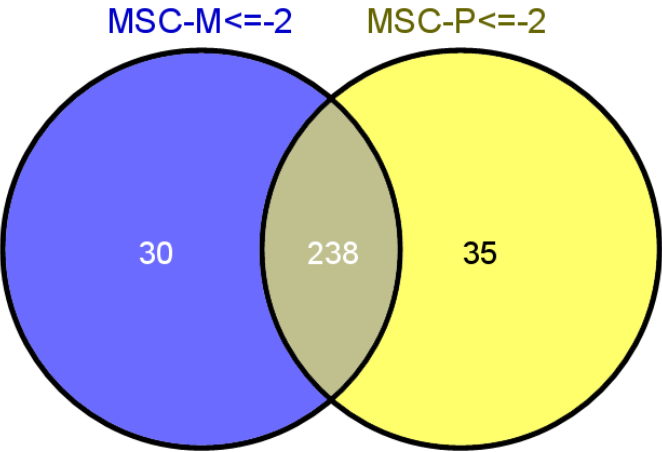

B

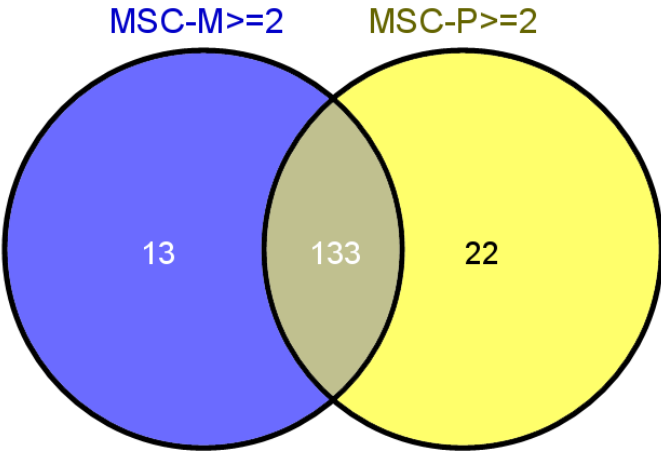

Supplementary Table 1: Lists of genes differentially expressed between bone Marrow MSCs and fetal membrane MSCs.

| <b>Genes overexpressed in BMMSCs as compared to MbMSCs</b>                                     |                     |                      |                |
|------------------------------------------------------------------------------------------------|---------------------|----------------------|----------------|
| <b>Gene name</b>                                                                               | <b>Accession Nb</b> | <b>Fold increase</b> | <b>P value</b> |
| cytochrome P450, family 1, subfamily B, polypeptide 1                                          | NM_000104           | 7.33                 | 0.012897       |
| elastin (supravalvular aortic stenosis, Williams-Beuren syndrome)                              | AA479278            | 6.33                 | 0.010858       |
| cytochrome P450, family 1, subfamily B, polypeptide 1                                          | AU154504            | 6.11                 | 0.010872       |
| cytochrome P450, family 1, subfamily B, polypeptide 1                                          | AU144855            | 5.93                 | 0.00025        |
| proenkephalin                                                                                  | NM_006211           | 5.86                 | 0.000005       |
| pentraxin-related gene, rapidly induced by IL-1 beta                                           | NM_002852           | 5.56                 | 0.005349       |
| potassium channel tetramerisation domain containing 12                                         | AI718937            | 5.55                 | 0.002833       |
| EGF-containing fibulin-like extracellular matrix protein 1                                     | AI826799            | 5.51                 | 0.004207       |
| tissue inhibitor of metalloproteinase 3 (Sorsby fundus dystrophy, pseudoinflammatory)          | NM_000362           | 5.47                 | 0.000003       |
| iroquois homeobox protein 3                                                                    | AI681917            | 5.26                 | 0.004546       |
| tissue inhibitor of metalloproteinase 3 (Sorsby fundus dystrophy, pseudoinflammatory)          | U67195              | 4.84                 | 0.000004       |
| paired-like homeodomain transcription factor 2                                                 | NM_000325           | 4.83                 | 0.003789       |
| phosphatidic acid phosphatase type 2B                                                          | AV725664            | 4.71                 | 0.000173       |
| tissue inhibitor of metalloproteinase 3 (Sorsby fundus dystrophy, pseudoinflammatory)          | BF347089            | 4.7                  | 0.000195       |
| hyaluronan and proteoglycan link protein 1                                                     | U43328              | 4.69                 | 0.000637       |
| UDP-N-acetyl-alpha-D-galactosamine:polypeptide N-acetylgalactosaminyltransferase 5 (GalNAc-T5) | AK022198            | 4.68                 | 0.000282       |
| Hyaluronan and proteoglycan link protein 1                                                     | AU144114            | 4.67                 | 0.001581       |
| filaggrin                                                                                      | AL356504            | 4.66                 | 0.000892       |
| fibronectin type III domain containing 1                                                       | AI345957            | 4.66                 | 0.002226       |
| prostaglandin I2 (prostacyclin) synthase /// prostaglandin I2 (prostacyclin) synthase          | NM_000961           | 4.57                 | 0.02255        |
| EGF-containing fibulin-like extracellular matrix protein 1                                     | NM_004105           | 4.53                 | 0.011438       |
| ribosomal protein S4, Y-linked 1                                                               | NM_001008           | 4.5                  | 0.000034       |
| prostaglandin-endoperoxide synthase 2 (prostaglandin G/H synthase and cyclooxygenase)          | NM_000963           | 4.49                 | 0.000164       |
| ankyrin 3, node of Ranvier (ankyrin G)                                                         | NM_020987           | 4.48                 | 0.000069       |

|                                                                                                                                                                                                                    |           |      |          |
|--------------------------------------------------------------------------------------------------------------------------------------------------------------------------------------------------------------------|-----------|------|----------|
| potassium channel tetramerisation domain containing 12 /// potassium channel tetramerisation domain containing 12                                                                                                  | AA551075  | 4.34 | 0.000002 |
| tissue inhibitor of metalloproteinase 3 (Sorsby fundus dystrophy, pseudoinflammatory)                                                                                                                              | AW338933  | 4.23 | 0.004671 |
| keratin associated protein 1-1 /// keratin associated protein 1-1                                                                                                                                                  | NM_030967 | 4.21 | 0.001068 |
| crystallin, alpha B                                                                                                                                                                                                | AF007162  | 4.18 | 0.000058 |
| aldehyde dehydrogenase 1 family, member A3                                                                                                                                                                         | NM_000693 | 4.15 | 0.000002 |
| paired related homeobox 2                                                                                                                                                                                          | NM_016307 | 4.13 | 0.000009 |
| importin 9                                                                                                                                                                                                         | AI659533  | 3.97 | 0.001591 |
| ABI gene family, member 3 (NESH) binding protein                                                                                                                                                                   | AB056106  | 3.94 | 0.001912 |
| integrin, beta-like 1 (with EGF-like repeat domains)                                                                                                                                                               | NM_004791 | 3.91 | 0.001888 |
| ectonucleotide pyrophosphatase/phosphodiesterase 2 (autotaxin)                                                                                                                                                     | L35594    | 3.88 | 0.001338 |
| microfibrillar associated protein 5                                                                                                                                                                                | AW665892  | 3.86 | 0.005145 |
| dapper homolog 1, antagonist of beta-catenin (xenopus)                                                                                                                                                             | NM_016651 | 3.85 | 0.00044  |
| hypothetical protein LOC283824                                                                                                                                                                                     | AI693140  | 3.77 | 0.006055 |
| transforming growth factor, beta-induced, 68kDa                                                                                                                                                                    | NM_000358 | 3.74 | 0.004246 |
| hypothetical protein DKFZp434L142                                                                                                                                                                                  | AF260333  | 3.74 | 0.010262 |
| gb:AL359052.1 /DB_XREF=gi:8518175 /FEA=mRNA /CNT=13 /TID=Hs.311054.0 /TIER=ConsEnd /STK=5 /UG=Hs.311054 /DEF=Homo sapiens mRNA full length insert cDNA clone EUROIMAGE 1968422. /PROD=ITGBL1, integrin beta-like 1 | AL359052  | 3.72 | 0.002959 |
| CDNA FLJ31059 fis, clone HSYRA2000832                                                                                                                                                                              | AA418028  | 3.72 | 0.012902 |
| phosphatidic acid phosphatase type 2B                                                                                                                                                                              | AA628586  | 3.71 | 0.000009 |
| UDP-N-acetyl-alpha-D-galactosamine:polypeptide N-acetylgalactosaminyltransferase 1 (GalNAc-T1)                                                                                                                     | BC038440  | 3.71 | 0.00319  |
| solute carrier family 14 (urea transporter), member 1 (Kidd blood group)                                                                                                                                           | NM_015865 | 3.66 | 0.000542 |
| receptor tyrosine kinase-like orphan receptor 1                                                                                                                                                                    | NM_005012 | 3.65 | 0.000712 |
| CDNA: FLJ23131 fis, clone LNG08502                                                                                                                                                                                 | AK026784  | 3.65 | 0.00001  |
| supervillin                                                                                                                                                                                                        | NM_003174 | 3.64 | 0.002608 |
| prostaglandin E synthase                                                                                                                                                                                           | NM_004878 | 3.64 | 0.003281 |
| UDP-N-acetyl-alpha-D-galactosamine:polypeptide N-acetylgalactosaminyltransferase 1 (GalNAc-T1)                                                                                                                     | AV692127  | 3.63 | 0.004216 |
| vascular cell adhesion molecule 1                                                                                                                                                                                  | NM_001078 | 3.59 | 0.006421 |
| lumican                                                                                                                                                                                                            | NM_002345 | 3.58 | 0.013693 |
| phosphatidic acid phosphatase type 2B                                                                                                                                                                              | AB000889  | 3.58 | 0.003956 |
| decorin                                                                                                                                                                                                            | AF138302  | 3.58 | 0.000003 |
| Homo sapiens, clone IMAGE:4794726, mRNA                                                                                                                                                                            | BF513121  | 3.58 | 0.022143 |
| GATA binding protein 6                                                                                                                                                                                             | D87811    | 3.57 | 0.001547 |

|                                                                                                                                                              |           |      |          |
|--------------------------------------------------------------------------------------------------------------------------------------------------------------|-----------|------|----------|
| Integrin, beta-like 1 (with EGF-like repeat domains)                                                                                                         | AI753143  | 3.57 | 0.000531 |
| cyclin-dependent kinase inhibitor 2B (p15, inhibits CDK4)                                                                                                    | AW444761  | 3.56 | 0.000531 |
| decorin                                                                                                                                                      | AF138300  | 3.5  | 0.000015 |
| endothelial cell-specific molecule 1                                                                                                                         | NM_007036 | 3.5  | 0.030103 |
| hyaluronan and proteoglycan link protein 1                                                                                                                   | NM_001884 | 3.48 | 0.00047  |
| CDNA clone IMAGE:4152983, partial cds                                                                                                                        | BF344237  | 3.48 | 0.000085 |
| integrin, alpha 11                                                                                                                                           | AF109681  | 3.48 | 0.000035 |
| UDP-N-acetyl-alpha-D-galactosamine:polypeptide N-acetylgalactosaminyltransferase 1 (GalNAc-T1)                                                               | NM_020474 | 3.47 | 0.019985 |
| major histocompatibility complex, class II, DP alpha 1                                                                                                       | M27487    | 3.47 | 0.000351 |
| Fibronectin 1                                                                                                                                                | AI333596  | 3.42 | 0.000247 |
| DEAD (Asp-Glu-Ala-Asp) box polypeptide 3, Y-linked                                                                                                           | NM_004660 | 3.41 | 0.003436 |
| chitinase 3-like 1 (cartilage glycoprotein-39)                                                                                                               | M80927    | 3.41 | 0.014534 |
| decorin                                                                                                                                                      | AF138303  | 3.41 | 0.000009 |
| UDP-N-acetyl-alpha-D-galactosamine:polypeptide N-acetylgalactosaminyltransferase 1 (GalNAc-T1)                                                               | U41514    | 3.38 | 0.003091 |
| serine (or cysteine) proteinase inhibitor, clade E (nexin, plasminogen activator inhibitor type 1), member 2                                                 | AL541302  | 3.38 | 0.025419 |
| Solute carrier family 14 (urea transporter), member 1 (Kidd blood group)                                                                                     | BE673587  | 3.37 | 0.000284 |
| hepatocyte growth factor (hepapoietin A; scatter factor)                                                                                                     | X16323    | 3.36 | 0.013948 |
| tumor protein D52-like 1                                                                                                                                     | NM_003287 | 3.33 | 0.065116 |
| pregnancy-associated plasma protein A, pappalysin 1                                                                                                          | BF107618  | 3.33 | 0.001763 |
| prostaglandin E synthase                                                                                                                                     | AF010316  | 3.32 | 0.001619 |
| gb:BF002195 /DB_XREF=gi:10702470 /DB_XREF=7h23h07.x1 /CLONE=IMAGE:3316861 /FEA=EST /CNT=8 /TID=Hs.131624.0 /TIER=ConsEnd /STK=6 /UG=Hs.131624 /UG_TITLE=ESTs | BF002195  | 3.31 | 0.000009 |
| lysyl oxidase                                                                                                                                                | L16895    | 3.27 | 0.012891 |
| EGF, latrophilin and seven transmembrane domain containing 1                                                                                                 | NM_022159 | 3.27 | 0.008722 |
| ankylosis, progressive homolog (mouse)                                                                                                                       | AA854943  | 3.27 | 0.000123 |
| interleukin 6 (interferon, beta 2)                                                                                                                           | NM_000600 | 3.2  | 0.014285 |
| microfibrillar associated protein 5                                                                                                                          | AW665892  | 3.2  | 0.000561 |
| microfibrillar associated protein 5                                                                                                                          | U37283    | 3.17 | 0.000114 |
| hypothetical protein FLJ14054                                                                                                                                | NM_024563 | 3.17 | 0.011334 |
| biglycan /// serologically defined colon cancer antigen 33                                                                                                   | AA845258  | 3.14 | 0.002314 |
| Hyaluronan synthase 2                                                                                                                                        | AI374739  | 3.14 | 0.033309 |
| adducin 3 (gamma)                                                                                                                                            | NM_019903 | 3.12 | 0.001478 |
| chemokine (C-X-C motif) ligand 12 (stromal cell-derived factor 1)                                                                                            | U19495    | 3.11 | 0.020188 |



|                                                                                                                                                                                                          |           |      |          |
|----------------------------------------------------------------------------------------------------------------------------------------------------------------------------------------------------------|-----------|------|----------|
| KIAA0746 protein                                                                                                                                                                                         | AB018289  | 3.11 | 0.012906 |
| pregnancy-associated plasma protein A, pappalysin 1                                                                                                                                                      | AI110886  | 3.11 | 0.004259 |
| gb:AW044286 /DB_XREF=gi:5904815 /DB_XREF=vv67c06.x1 /CLONE=IMAGE:2534602 /FEA=EST /CNT=19 /TID=Hs.174134.2 /TIER=Stack /STK=18 /UG=Hs.174134 /LL=51204 /UG_GENE=LOC51204 /UG_TITLE=clone HQ0477 PRO0477p | AW044286  | 3.1  | 0.002618 |
| KIAA1199                                                                                                                                                                                                 | AB033025  | 3.09 | 0.000161 |
| ankyrin repeat domain 1 (cardiac muscle)                                                                                                                                                                 | NM_014391 | 3.08 | 0.000087 |
| Ubiquitin specific protease 9, Y-linked (fat facets-like, Drosophila)                                                                                                                                    | AV681765  | 3.08 | 0.002173 |
| CD74 antigen (invariant polypeptide of major histocompatibility complex, class II antigen-associated)                                                                                                    | K01144    | 3.07 | 0.006218 |
| biglycan                                                                                                                                                                                                 | BC002416  | 3.06 | 0.000576 |
| Forkhead box C2 (MFH-1, mesenchyme forkhead 1)                                                                                                                                                           | BF446723  | 3.05 | 0.000519 |
| Hyaluronan and proteoglycan link protein 1                                                                                                                                                               | AI760252  | 3.04 | 0.000025 |
| early B-cell factor 3                                                                                                                                                                                    | AL354950  | 3.03 | 0.000191 |
| similar to expressed sequence AI593442                                                                                                                                                                   | H24398    | 3    | 0.002891 |
| tumor necrosis factor, alpha-induced protein 3                                                                                                                                                           | NM_006290 | 2.99 | 0.000184 |
| adducin 3 (gamma)                                                                                                                                                                                        | AI818488  | 2.99 | 0.000002 |
| gb:AW964972 /DB_XREF=gi:8154808 /DB_XREF=EST377045 /FEA=EST /CNT=66 /TID=Hs.48516.1 /TIER=Stack /STK=50 /UG=Hs.48516 /UG_TITLE=ESTs                                                                      | AW964972  | 2.99 | 0.001636 |
| insulin-like growth factor binding protein 3                                                                                                                                                             | BF340228  | 2.98 | 0.000097 |
| DEP domain containing 6                                                                                                                                                                                  | NM_022783 | 2.98 | 0.008254 |
| v-maf musculoaponeurotic fibrosarcoma oncogene homolog (avian)                                                                                                                                           | AF055376  | 2.96 | 0.000236 |
| insulin-like growth factor binding protein 3                                                                                                                                                             | M31159    | 2.95 | 0.000168 |
| pregnancy-associated plasma protein A, pappalysin 1                                                                                                                                                      | BF107618  | 2.95 | 0.000422 |
| decorin                                                                                                                                                                                                  | AI281593  | 2.94 | 0.002426 |
| placental growth factor, vascular endothelial growth factor-related protein                                                                                                                              | BC001422  | 2.94 | 0.001983 |
| dehydrogenase/reductase (SDR family) member 3                                                                                                                                                            | NM_004753 | 2.93 | 0.044484 |
| chitinase 3-like 1 (cartilage glycoprotein-39)                                                                                                                                                           | M80927    | 2.93 | 0.00636  |
| Kruppel-like factor 4 (gut)                                                                                                                                                                              | BF514079  | 2.93 | 0.000177 |
| Ifapsoriasis                                                                                                                                                                                             | BC029685  | 2.93 | 0.006046 |
| adducin 3 (gamma)                                                                                                                                                                                        | BE545756  | 2.92 | 0.007616 |
| adducin 3 (gamma)                                                                                                                                                                                        | AI763123  | 2.91 | 0.002057 |
| hephaestin                                                                                                                                                                                               | NM_014799 | 2.91 | 0.000072 |
| cartilage oligomeric matrix protein                                                                                                                                                                      | NM_000095 | 2.91 | 0.000958 |
| chromosome 7 open reading frame 10                                                                                                                                                                       | NM_024728 | 2.91 | 0.000619 |

|                                                                                                |           |      |          |
|------------------------------------------------------------------------------------------------|-----------|------|----------|
| cytoglobin                                                                                     | AL513673  | 2.89 | 0.002445 |
| hemicentin                                                                                     | BF446673  | 2.87 | 0.002542 |
| fibroblast growth factor 7 (keratinocyte growth factor)                                        | NM_002009 | 2.86 | 0.011871 |
| pregnancy-associated plasma protein A, pappalysin 1                                            | AA148534  | 2.84 | 0.000014 |
| chondroitin sulfate proteoglycan 2 (versican)                                                  | NM_004385 | 2.84 | 0.048368 |
| serine/threonine kinase 38 like                                                                | AW779556  | 2.84 | 0.000755 |
| chondroitin sulfate proteoglycan 2 (versican)                                                  | BF218922  | 2.84 | 0.051535 |
| hypothetical protein FLJ38725                                                                  | AI659800  | 2.84 | 0.008957 |
| cell cycle progression 1                                                                       | NM_004748 | 2.79 | 0.031828 |
| kelch-like 13 (Drosophila)                                                                     | AB037730  | 2.79 | 0.003817 |
| complement factor H /// complement factor H-related 1                                          | X56210    | 2.78 | 0.009071 |
| hypothetical protein FLJ14834                                                                  | AW084730  | 2.78 | 0.000052 |
| ATP-binding cassette, sub-family A (ABC1), member 8                                            | NM_007168 | 2.77 | 0.009808 |
| latrophilin 2                                                                                  | NM_012302 | 2.77 | 0.002049 |
| ankyrin repeat domain 29                                                                       | AI307802  | 2.77 | 0.003593 |
| homeo box C10                                                                                  | NM_017409 | 2.76 | 0.000002 |
| core 1 synthase, glycoprotein-N-acetylgalactosamine 3-beta-galactosyltransferase, 1            | NM_020156 | 2.76 | 0.005101 |
| insulin-like growth factor binding protein 2, 36kDa                                            | NM_000597 | 2.74 | 0.005157 |
| SMAD, mothers against DPP homolog 6 (Drosophila)                                               | NM_005585 | 2.74 | 0.002854 |
| periostin, osteoblast specific factor                                                          | AY140646  | 2.73 | 0.003773 |
| stanniocalcin 2                                                                                | AI435828  | 2.71 | 0.000868 |
| aldo-keto reductase family 1, member C3 (3-alpha hydroxysteroid dehydrogenase, type II)        | AB018580  | 2.71 | 0.107687 |
| heme oxygenase (decycling) 1                                                                   | NM_002133 | 2.7  | 0.000176 |
| transforming growth factor, beta receptor I (activin A receptor type II-like kinase, 53kDa)    | AA604375  | 2.7  | 0.01479  |
| hypothetical gene supported by BC009385                                                        | AL520272  | 2.7  | 0.000024 |
| collagen triple helix repeat containing 1                                                      | AA584310  | 2.69 | 0.000252 |
| lysyl oxidase                                                                                  | NM_002317 | 2.68 | 0.004286 |
| KIAA0367                                                                                       | AB002365  | 2.67 | 0.000041 |
| jagged 1 (Alagille syndrome)                                                                   | U73936    | 2.63 | 0.009975 |
| Full-length cDNA clone CS0DD009YB17 of Neuroblastoma Cot 50-normalized of Homo sapiens (human) | AK000776  | 2.63 | 0.012529 |
| CDNA FLJ44429 fis, clone UTERU2015653                                                          | AI088063  | 2.62 | 0.048991 |
| adiponutrin                                                                                    | AK025665  | 2.62 | 0.007312 |
| NACHT, leucine rich repeat and PYD (pyrin domain) containing 1                                 | NM_021730 | 2.6  | 0.010521 |

|                                                                                                                                                              |           |      |          |
|--------------------------------------------------------------------------------------------------------------------------------------------------------------|-----------|------|----------|
| hyaluronan synthase 2                                                                                                                                        | NM_005328 | 2.59 | 0.022251 |
| jagged 1 (Alagille syndrome)                                                                                                                                 | U77914    | 2.59 | 0.00968  |
| Full length insert cDNA clone ZD77F06                                                                                                                        | AI655611  | 2.59 | 0.008924 |
| SMAD, mothers against DPP homolog 6 (Drosophila)                                                                                                             | AI193899  | 2.58 | 0.00196  |
| pregnancy-associated plasma protein A, pappalysin 1                                                                                                          | BG434272  | 2.55 | 0.008046 |
| Full-length cDNA clone CS0DI014YH21 of Placenta Cot 25-normalized of Homo sapiens (human)                                                                    | BF058422  | 2.54 | 0.001347 |
| zinc finger protein 503                                                                                                                                      | AA603467  | 2.54 | 0.001422 |
| putative small membrane protein NID67                                                                                                                        | AF313413  | 2.53 | 0.005377 |
| Jagged 1 (Alagille syndrome)                                                                                                                                 | AI457817  | 2.53 | 0.000606 |
| chondroitin sulfate proteoglycan 2 (versican) /// chondroitin sulfate proteoglycan 2 (versican)                                                              | R94644    | 2.52 | 0.039853 |
| Core 1 synthase, glycoprotein-N-acetylgalactosamine 3-beta-galactosyltransferase, 1                                                                          | AI672489  | 2.52 | 0.002588 |
| Collagen, type VIII, alpha 1                                                                                                                                 | AL359062  | 2.52 | 0.000237 |
| fibronectin 1                                                                                                                                                | X02761    | 2.51 | 0.00053  |
| chondroitin sulfate proteoglycan 2 (versican)                                                                                                                | BF590263  | 2.5  | 0.058619 |
| gb:AA954994 /DB_XREF=gi:3118689 /DB_XREF=op24f03.s1 /CLONE=IMAGE:1577789 /FEA=EST /CNT=15 /TID=Hs.237396.1 /TIER=ConsEnd /STK=1 /UG=Hs.237396 /UG_TITLE=ESTs | AA954994  | 2.49 | 0.000628 |
| fibronectin 1                                                                                                                                                | AF130095  | 2.48 | 0.00132  |
| EGF-like repeats and discoidin I-like domains 3                                                                                                              | AA053711  | 2.48 | 0.028579 |
| stanniocalcin 2                                                                                                                                              | BC000658  | 2.47 | 0.00262  |
| Similar to circumsporozoite protein precursor - Plasmodium brasilianum                                                                                       | H10408    | 2.47 | 0.005108 |
| insulin-like growth factor binding protein 4                                                                                                                 | NM_001552 | 2.46 | 0.020264 |
| fibronectin 1 /// fibronectin 1                                                                                                                              | BC005858  | 2.46 | 0.000361 |
| major histocompatibility complex, class II, DR beta 1                                                                                                        | AJ297586  | 2.46 | 0        |
| transmembrane, prostate androgen induced RNA                                                                                                                 | AL035541  | 2.46 | 0.033789 |
| CDNA FLJ26539 fis, clone KDN09310                                                                                                                            | AW025579  | 2.45 | 0.006846 |
| heat shock 27kDa protein family, member 7 (cardiovascular)                                                                                                   | NM_014424 | 2.45 | 0.000191 |
| procollagen C-endopeptidase enhancer 2                                                                                                                       | NM_013363 | 2.45 | 0.000153 |
| periostin, osteoblast specific factor                                                                                                                        | AY140646  | 2.44 | 0.020504 |
| fibronectin 1                                                                                                                                                | AK026737  | 2.43 | 0.00084  |
| phosphoglucosyltransferase 1                                                                                                                                 | NM_002633 | 2.42 | 0.000453 |
| phospholipase A2, group IVA (cytosolic, calcium-dependent)                                                                                                   | M68874    | 2.42 | 0.010441 |
| protein phosphatase 1, regulatory (inhibitor) subunit 3C                                                                                                     | N26005    | 2.41 | 0.000098 |
| fibronectin 1                                                                                                                                                | AJ276395  | 2.39 | 0.003929 |
| Transcribed locus                                                                                                                                            | AI761573  | 2.39 | 0.039653 |

|                                                                                                                                                                                                                                                                                                       |           |      |          |
|-------------------------------------------------------------------------------------------------------------------------------------------------------------------------------------------------------------------------------------------------------------------------------------------------------|-----------|------|----------|
| vascular endothelial growth factor                                                                                                                                                                                                                                                                    | AF022375  | 2.38 | 0.000351 |
| UDP-N-acetyl-alpha-D-galactosamine:polypeptide N-acetylgalactosaminyltransferase 5 (GalNAc-T5)                                                                                                                                                                                                        | AI633503  | 2.38 | 0.00005  |
| connective tissue growth factor                                                                                                                                                                                                                                                                       | M92934    | 2.36 | 0.015837 |
| fibronectin 1                                                                                                                                                                                                                                                                                         | AJ276395  | 2.36 | 0.000425 |
| BMP and activin membrane-bound inhibitor                                                                                                                                                                                                                                                              | NM_012342 | 2.35 | 0.000426 |
| zinc finger protein 423                                                                                                                                                                                                                                                                               | AW149417  | 2.34 | 0.002103 |
| sine oculis homeobox homolog 1 (Drosophila)                                                                                                                                                                                                                                                           | NM_005982 | 2.32 | 0.012124 |
| hyaluronan synthase 1                                                                                                                                                                                                                                                                                 | NM_001523 | 2.32 | 0.003651 |
| MRNA; cDNA DKFZp313C0240 (from clone DKFZp313C0240)                                                                                                                                                                                                                                                   | H16409    | 2.32 | 0.027062 |
| fibroblast growth factor 7 (keratinocyte growth factor) /// hypothetical protein FLJ30435                                                                                                                                                                                                             | AF523265  | 2.32 | 0.038532 |
| aldo-keto reductase family 1, member C2 (dihydrodiol dehydrogenase 2; bile acid binding protein; 3-alpha hydroxysteroid dehydrogenase, type III) /// aldo-keto reductase family 1, member C2 (dihydrodiol dehydrogenase 2; bile acid binding protein; 3-alpha hydroxysteroid dehydrogenase, type III) | M33376    | 2.31 | 0.005436 |
| natriuretic peptide receptor C/guanylate cyclase C (atrionatriuretic peptide receptor C)                                                                                                                                                                                                              | AI628360  | 2.31 | 0.005662 |
| lysyl oxidase-like 3                                                                                                                                                                                                                                                                                  | AI917716  | 2.3  | 0.005012 |
| hypothetical LOC389048                                                                                                                                                                                                                                                                                | BG285837  | 2.3  | 0.018044 |
| cadherin 6, type 2, K-cadherin (fetal kidney)                                                                                                                                                                                                                                                         | AU151483  | 2.29 | 0.000212 |
| Doublecortin and CaM kinase-like 1                                                                                                                                                                                                                                                                    | AI129626  | 2.29 | 0.00379  |
| cytokine receptor-like factor 1                                                                                                                                                                                                                                                                       | NM_004750 | 2.28 | 0.002113 |
| FYN oncogene related to SRC, FGR, YES                                                                                                                                                                                                                                                                 | M14333    | 2.28 | 0.004506 |
| phosphodiesterase 4D interacting protein (myomegalin)                                                                                                                                                                                                                                                 | AB042557  | 2.28 | 0.001622 |
| glutaminase                                                                                                                                                                                                                                                                                           | NM_014905 | 2.27 | 0.003222 |
| aggrecan 1 (chondroitin sulfate proteoglycan 1, large aggregating proteoglycan, antigen identified by monoclonal antibody A0122)                                                                                                                                                                      | NM_013227 | 2.27 | 0.000454 |
| chromosome 5 open reading frame 13                                                                                                                                                                                                                                                                    | NM_004772 | 2.26 | 0.005727 |
| major histocompatibility complex, class II, DR beta 1 /// major histocompatibility complex, class II, DR beta 1                                                                                                                                                                                       | U65585    | 2.26 | 0.000136 |
| periostin, osteoblast specific factor                                                                                                                                                                                                                                                                 | D13665    | 2.26 | 0.028548 |
| WAP four-disulfide core domain 1                                                                                                                                                                                                                                                                      | NM_021197 | 2.26 | 0.001431 |
| Ras association (RalGDS/AF-6) and pleckstrin homology domains 1                                                                                                                                                                                                                                       | AA194149  | 2.26 | 0.004622 |
| glutathione peroxidase 7                                                                                                                                                                                                                                                                              | AA406605  | 2.25 | 0.001144 |
| ependymin related protein 1 (zebrafish)                                                                                                                                                                                                                                                               | BC000686  | 2.25 | 0.000213 |
| netrin 4                                                                                                                                                                                                                                                                                              | AF278532  | 2.25 | 0.036148 |
| docking protein 1, 62kDa (downstream of tyrosine kinase 1)                                                                                                                                                                                                                                            | AF035299  | 2.24 | 0.000392 |

|                                                                                                                                                                                                                                                                  |           |      |          |
|------------------------------------------------------------------------------------------------------------------------------------------------------------------------------------------------------------------------------------------------------------------|-----------|------|----------|
| CD24 antigen (small cell lung carcinoma cluster 4 antigen)                                                                                                                                                                                                       | AA761181  | 2.23 | 0.059119 |
| Hypothetical gene supported by AF275804                                                                                                                                                                                                                          | AA954994  | 2.23 | 0.000604 |
| bone morphogenetic protein 1                                                                                                                                                                                                                                     | NM_001199 | 2.22 | 0.00161  |
| LIM domain only 2 (rhombotin-like 1)                                                                                                                                                                                                                             | NM_005574 | 2.21 | 0.001691 |
| neurotrimin                                                                                                                                                                                                                                                      | AW085558  | 2.21 | 0.016539 |
| Glypican 6                                                                                                                                                                                                                                                       | AI651255  | 2.2  | 0.023473 |
| Transcribed locus                                                                                                                                                                                                                                                | BF513800  | 2.2  | 0.013426 |
| glutaminase                                                                                                                                                                                                                                                      | AF097493  | 2.19 | 0.01056  |
| keratin 23 (histone deacetylase inducible)                                                                                                                                                                                                                       | NM_015515 | 2.19 | 0.007531 |
| cathepsin D (lysosomal aspartyl protease)                                                                                                                                                                                                                        | AV706254  | 2.19 | 0.002301 |
| gb:AB020690.1 /DB_XREF=gi:4240254 /GEN=KIAA0883 /FEA=FLmRNA /CNT=85 /TID=Hs.7782.0 /TIER=FL+Stack /STK=20 /UG=Hs.7782 /LL=10687 /DEF=Homo sapiens mRNA for KIAA0883 protein, complete cds. /PROD=KIAA0883 protein /FL=gb:NM_007257.1 gb:AB020690.1 gb:AF286487.1 | AB020690  | 2.18 | 0.002667 |
| aldo-keto reductase family 1, member C2 (dihydrodiol dehydrogenase 2; bile acid binding protein; 3-alpha hydroxysteroid dehydrogenase, type III)                                                                                                                 | U05598    | 2.18 | 0.089865 |
| phosphodiesterase 7B                                                                                                                                                                                                                                             | AI638433  | 2.18 | 0.000407 |
| cysteine-rich protein 1 (intestinal)                                                                                                                                                                                                                             | NM_001311 | 2.17 | 0.001278 |
| cadherin 11, type 2, OB-cadherin (osteoblast)                                                                                                                                                                                                                    | D21254    | 2.17 | 0.00179  |
| KIAA1671 protein                                                                                                                                                                                                                                                 | AB051458  | 2.17 | 0.003885 |
| family with sequence similarity 43, member A                                                                                                                                                                                                                     | AW264102  | 2.17 | 0.009784 |
| bone morphogenetic protein 1                                                                                                                                                                                                                                     | NM_006132 | 2.15 | 0.003523 |
| KIAA1644 protein                                                                                                                                                                                                                                                 | BF516072  | 2.15 | 0.000625 |
| CD24 antigen (small cell lung carcinoma cluster 4 antigen)                                                                                                                                                                                                       | L33930    | 2.15 | 0.053754 |
| tissue inhibitor of metalloproteinase 1 (erythroid potentiating activity, collagenase inhibitor)                                                                                                                                                                 | NM_003254 | 2.14 | 0.000197 |
| growth arrest-specific 1                                                                                                                                                                                                                                         | NM_002048 | 2.14 | 0.016595 |
| gap junction protein, alpha 1, 43kDa (connexin 43)                                                                                                                                                                                                               | NM_000165 | 2.12 | 0.020671 |
| ectonucleotide pyrophosphatase/phosphodiesterase 2 (autotaxin)                                                                                                                                                                                                   | D45421    | 2.12 | 0.00054  |
| gb:BC042886.1 /DB_XREF=gi:27503667 /TID=Hs2.127876.1 /CNT=3 /FEA=mRNA /TIER=ConsEnd /STK=1 /UG=Hs.127876 /UG_TITLE=Homo sapiens, clone IMAGE:5273182, mRNA /DEF=Homo sapiens, clone IMAGE:5273182, mRNA.                                                         | BC042886  | 2.12 | 0.010966 |
| Methyltransferase 5 domain containing 1                                                                                                                                                                                                                          | AK091261  | 2.12 | 0.035293 |
| Homo sapiens, Similar to HERV-H LTR-associating 3, clone IMAGE:4830680, mRNA                                                                                                                                                                                     | BC031956  | 2.12 | 0.008667 |
| 4-aminobutyrate aminotransferase                                                                                                                                                                                                                                 | AF237813  | 2.11 | 0.01767  |
| interferon-induced protein 44                                                                                                                                                                                                                                    | NM_006417 | 2.11 | 0.003538 |
| leukemia inhibitory factor (cholinergic differentiation factor)                                                                                                                                                                                                  | NM_002309 | 2.1  | 0.006087 |

|                                                                                                                       |           |      |          |
|-----------------------------------------------------------------------------------------------------------------------|-----------|------|----------|
| chromosome 10 open reading frame 54                                                                                   | BE271644  | 2.1  | 0.008587 |
| leptin receptor                                                                                                       | U50748    | 2.08 | 0.002045 |
| zinc finger protein 324                                                                                               | NM_014347 | 2.07 | 0.002588 |
| aryl hydrocarbon receptor                                                                                             | NM_001621 | 2.06 | 0.000804 |
| midline 1 (Opitz/BBB syndrome)                                                                                        | NM_000381 | 2.06 | 0.000642 |
| KIAA1102 protein                                                                                                      | AK026815  | 2.05 | 0.001853 |
| frizzled homolog 8 (Drosophila)                                                                                       | AW340311  | 2.05 | 0.000275 |
| Transcribed locus                                                                                                     | BG236273  | 2.05 | 0.000793 |
| similar to AVLV472                                                                                                    | BC021680  | 2.05 | 0.003848 |
| EPH receptor A3                                                                                                       | AF213459  | 2.04 | 0.000059 |
| twist homolog 1 (acrocephalosyndactyly 3; Saethre-Chotzen syndrome) (Drosophila)                                      | X99268    | 2.04 | 0.000443 |
| frizzled homolog 8 (Drosophila) /// frizzled homolog 8 (Drosophila)                                                   | AB043703  | 2.04 | 0.006428 |
| ankyrin 2, neuronal                                                                                                   | BF726212  | 2.03 | 0.007184 |
| frizzled homolog 1 (Drosophila)                                                                                       | NM_003505 | 2.03 | 0.000091 |
| ankylosis, progressive homolog (mouse)                                                                                | T99215    | 2.03 | 0.000498 |
| microtubule-associated protein 1B                                                                                     | AA554833  | 2.03 | 0.001507 |
| ectodermal-neural cortex (with BTB-like domain)                                                                       | AF010314  | 2.02 | 0.001284 |
| collagen, type VIII, alpha 2                                                                                          | AI806793  | 2.02 | 0.014233 |
| nicotinamide N-methyltransferase                                                                                      | NM_006169 | 2.01 | 0.010349 |
| serine (or cysteine) proteinase inhibitor, clade F (alpha-2 antiplasmin, pigment epithelium derived factor), member 1 | NM_002615 | 2.01 | 0.003976 |
| Adipocyte-specific adhesion molecule                                                                                  | BG112263  | 2.01 | 0.00072  |
| leucine-rich repeat-containing G protein-coupled receptor 4                                                           | NM_018490 | 2    | 0.010269 |
| LOC440156                                                                                                             | AL530703  | 2    | 0.000325 |
| Serine (or cysteine) proteinase inhibitor, clade E (nexin, plasminogen activator inhibitor type 1), member 2          | AA703280  | 2    | 0.006496 |

| <b>Genes overexpressed in Mb-MSCs as compared to BM-MSCs</b>                                                                                                |                     |                      |                |
|-------------------------------------------------------------------------------------------------------------------------------------------------------------|---------------------|----------------------|----------------|
| <b>Gene name</b>                                                                                                                                            | <b>Accession Nb</b> | <b>Fold increase</b> | <b>P value</b> |
| chromosome 10 open reading frame 58                                                                                                                         | BF512388            | 2                    | 0.020095       |
| putative homeodomain transcription factor 2                                                                                                                 | AL136883            | 2.01                 | 0.017603       |
| tetraspanin 5 /// tetraspanin 5                                                                                                                             | AF065389            | 2.01                 | 0.000076       |
| Dedicator of cytokinesis 2                                                                                                                                  | AI991459            | 2.02                 | 0.017508       |
| phorbol-12-myristate-13-acetate-induced protein 1                                                                                                           | AI857639            | 2.03                 | 0.011667       |
| nucleoredoxin                                                                                                                                               | NM_017821           | 2.03                 | 0.002391       |
| guanylate binding protein 3                                                                                                                                 | AL136680            | 2.03                 | 0.033813       |
| gb:AI963304 /DB_XREF=gi:5756017 /DB_XREF=wt61d01.x1 /CLONE=IMAGE:2511937 /FEA=EST /CNT=18 /TID=Hs.110373.0 /TIER=Stack /STK=13 /UG=Hs.110373 /UG_TITLE=ESTs | AI963304            | 2.03                 | 0.016889       |
| tribbles homolog 1 (Drosophila)                                                                                                                             | NM_025195           | 2.04                 | 0.009209       |
| leucine rich repeat containing 17                                                                                                                           | NM_005824           | 2.04                 | 0.00018        |
| nucleolar and spindle associated protein 1                                                                                                                  | NM_018454           | 2.04                 | 0.000496       |
| Growth arrest-specific 2 like 3                                                                                                                             | AI860012            | 2.04                 | 0.010473       |
| hypothetical LOC387763                                                                                                                                      | AW276078            | 2.06                 | 0.002767       |
| kinesin family member 2C                                                                                                                                    | U63743              | 2.1                  | 0.000541       |
| PDZ and LIM domain 1 (elfin)                                                                                                                                | BC000915            | 2.11                 | 0.013929       |
| calponin 1, basic, smooth muscle                                                                                                                            | NM_001299           | 2.13                 | 0.003582       |
| serine/threonine kinase 6                                                                                                                                   | NM_003600           | 2.13                 | 0.001585       |
| MCM10 minichromosome maintenance deficient 10 (S. cerevisiae)                                                                                               | AL136840            | 2.13                 | 0.025608       |
| Full-length cDNA clone CS0DK010YC18 of HeLa cells Cot 25-normalized of Homo sapiens (human)                                                                 | AI521166            | 2.13                 | 0.065313       |
| agrin                                                                                                                                                       | AK021586            | 2.14                 | 0.047548       |
| churchill domain containing 1                                                                                                                               | BE568660            | 2.14                 | 0.023507       |
| transcription factor 19 (SC1)                                                                                                                               | BC002493            | 2.15                 | 0.011675       |
| aminoacylase 1-like 2                                                                                                                                       | AI654133            | 2.15                 | 0.020177       |
| stanniocalcin 1                                                                                                                                             | AI300520            | 2.16                 | 0.000327       |
| cell division cycle associated 7 /// cell division cycle associated 7                                                                                       | AY029179            | 2.16                 | 0.00483        |
| apolipoprotein B mRNA editing enzyme, catalytic polypeptide-like 3B                                                                                         | NM_004900           | 2.17                 | 0.001528       |
| collagen, type VII, alpha 1 (epidermolysis bullosa, dystrophic, dominant and recessive)                                                                     | NM_000094           | 2.18                 | 0.005335       |
| stanniocalcin 1                                                                                                                                             | NM_003155           | 2.18                 | 0.003147       |
| ARG99 protein                                                                                                                                               | AU151239            | 2.18                 | 0.000208       |

|                                                                                                                                                                                                              |           |      |          |
|--------------------------------------------------------------------------------------------------------------------------------------------------------------------------------------------------------------|-----------|------|----------|
| chromosome 20 open reading frame 129                                                                                                                                                                         | BC001068  | 2.2  | 0.008017 |
| Hypothetical protein FLJ13273                                                                                                                                                                                | AA740875  | 2.2  | 0.035591 |
| hairy and enhancer of split 1, (Drosophila)                                                                                                                                                                  | BE973687  | 2.22 | 0.003364 |
| associated molecule with the SH3 domain of STAM (AMSH) like protein                                                                                                                                          | AI638611  | 2.22 | 0.005625 |
| E2F transcription factor 7                                                                                                                                                                                   | AI341146  | 2.22 | 0.001256 |
| Stanniocalcin 1                                                                                                                                                                                              | AW003173  | 2.22 | 0.001695 |
| hypothetical protein LOC146909                                                                                                                                                                               | AA292789  | 2.23 | 0.000239 |
| sal-like 1 (Drosophila)                                                                                                                                                                                      | AU152837  | 2.23 | 0.041534 |
| FERM domain containing 4A                                                                                                                                                                                    | AW515645  | 2.24 | 0.004551 |
| KIAA0186 gene product                                                                                                                                                                                        | NM_021067 | 2.25 | 0.002412 |
| thyrotropin-releasing hormone degrading ectoenzyme                                                                                                                                                           | NM_013381 | 2.25 | 0.001138 |
| hypothetical protein MGC11324 /// hypothetical protein MGC11324                                                                                                                                              | BC006236  | 2.26 | 0.008964 |
| L1 cell adhesion molecule                                                                                                                                                                                    | AI653981  | 2.27 | 0.014375 |
| solute carrier family 7 (cationic amino acid transporter, y+ system), member 2                                                                                                                               | AA876372  | 2.27 | 0.003413 |
| elastin microfibril interfacer 2 /// elastin microfibril interfacer 2                                                                                                                                        | AF270513  | 2.29 | 0.001206 |
| S100 calcium binding protein A4 (calcium protein, calvasculin, metastasin, murine placental homolog)                                                                                                         | NM_002961 | 2.3  | 0.030394 |
| glutathione S-transferase theta 1                                                                                                                                                                            | NM_000853 | 2.3  | 0.009944 |
| ribonucleotide reductase M2 polypeptide                                                                                                                                                                      | BC001886  | 2.3  | 0.000397 |
| Nuclear receptor subfamily 2, group F, member 1                                                                                                                                                              | AI951185  | 2.31 | 0.016112 |
| insulin receptor substrate 2                                                                                                                                                                                 | BF700086  | 2.32 | 0.002012 |
| aldehyde oxidase 1                                                                                                                                                                                           | NM_001159 | 2.33 | 0.003584 |
| agrin                                                                                                                                                                                                        | AW008051  | 2.34 | 0.020921 |
| hypothetical protein MGC45871                                                                                                                                                                                | AI961778  | 2.34 | 0.000403 |
| fatty acid binding protein 4, adipocyte                                                                                                                                                                      | NM_001442 | 2.35 | 0.012268 |
| Chromosome 6 open reading frame 155                                                                                                                                                                          | BE500942  | 2.35 | 0.02984  |
| CDC20 cell division cycle 20 homolog (S. cerevisiae)                                                                                                                                                         | NM_001255 | 2.36 | 0.002795 |
| PHD finger protein 19                                                                                                                                                                                        | BE544837  | 2.36 | 0.004485 |
| ARG99 protein                                                                                                                                                                                                | BF109231  | 2.37 | 0.002605 |
| gb:AW139393/DB_XREF=gi:6144111/DB_XREF=UI-H-BI1-adq-c-06-0-UI.s1/CLONE=IMAGE:2717578/FEA=EST/CNT=14/TID=Hs.62954.2/TIER=Stack/STK=11/UG=Hs.62954/LL=2495/UG_GENE=FTH1/UG_TITLE=ferritin, heavy polypeptide 1 | AW139393  | 2.37 | 0.002988 |
| retinoic acid receptor responder (tazarotene induced) 2                                                                                                                                                      | BC000069  | 2.39 | 0.005649 |
| suppressor of cytokine signaling 1                                                                                                                                                                           | AB005043  | 2.4  | 0.063822 |
| hypothetical LOC388610                                                                                                                                                                                       | AA037766  | 2.4  | 0.001844 |



|                                                                                                                                                     |           |      |          |
|-----------------------------------------------------------------------------------------------------------------------------------------------------|-----------|------|----------|
| neurexin 3                                                                                                                                          | NM_004796 | 2.41 | 0.010341 |
| exocyst complex component 7                                                                                                                         | AK023832  | 2.47 | 0.011497 |
| hypothetical protein MGC45871                                                                                                                       | BG036514  | 2.47 | 0.001233 |
| glutaredoxin (thioltransferase)                                                                                                                     | NM_002064 | 2.48 | 0.002461 |
| stathmin-like 3                                                                                                                                     | AL353715  | 2.51 | 0.000756 |
| regeneration associated muscle protease                                                                                                             | AI671186  | 2.52 | 0.000086 |
| T-box 3 (ulnar mammary syndrome)                                                                                                                    | AI806338  | 2.53 | 0.003524 |
| ribonucleotide reductase M2 polypeptide                                                                                                             | BE966236  | 2.54 | 0.002883 |
| glutaredoxin (thioltransferase)                                                                                                                     | AF162769  | 2.54 | 0.008125 |
| BH-protocadherin (brain-heart)                                                                                                                      | NM_002589 | 2.55 | 0.041771 |
| Homo sapiens, clone IMAGE:4865533, mRNA                                                                                                             | AA622837  | 2.55 | 0.002441 |
| deiodinase, iodothyronine, type II                                                                                                                  | NM_013989 | 2.58 | 0.012863 |
| tumor necrosis factor (ligand) superfamily, member 4 (tax-transcriptionally activated glycoprotein 1, 34kDa)                                        | NM_003326 | 2.58 | 0.001359 |
| heat shock 70kDa protein 2                                                                                                                          | U56725    | 2.6  | 0.00041  |
| hypothetical protein MGC16121                                                                                                                       | BE048571  | 2.6  | 0.017238 |
| transcription factor AP-2 alpha (activating enhancer binding protein 2 alpha)                                                                       | BF343007  | 2.61 | 0.000313 |
| renin                                                                                                                                               | NM_000537 | 2.63 | 0.045025 |
| chromosome 1 open reading frame 24                                                                                                                  | AF288391  | 2.64 | 0.025609 |
| Hypothetical protein MGC16121                                                                                                                       | AA234096  | 2.65 | 0.01469  |
| odd-skipped related 2 (Drosophila)                                                                                                                  | AI811298  | 2.67 | 0.006123 |
| gb:AV699565 /DB_XREF=gi:10301536 /DB_XREF=AV699565 /CLONE=GKCDPD06 /FEA=EST /CNT=9 /TID=Hs.128065.0 /TIER=Stack /STK=9 /UG=Hs.128065 /UG_TITLE=ESTs | AV699565  | 2.67 | 0.003202 |
| caspase 1, apoptosis-related cysteine protease (interleukin 1, beta, convertase) /// CARD only protein                                              | NM_052889 | 2.67 | 0.012445 |
| interferon-induced protein with tetratricopeptide repeats 1 /// interferon-induced protein with tetratricopeptide repeats 1                         | NM_001548 | 2.68 | 0.014462 |
| CDNA clone IMAGE:6025865, partial cds                                                                                                               | AA156240  | 2.72 | 0.011709 |
| KIAA1576 protein                                                                                                                                    | AA156723  | 2.72 | 0.000919 |
| homeo box A11                                                                                                                                       | H94842    | 2.73 | 0.000994 |
| KIAA1912 protein                                                                                                                                    | AI376433  | 2.73 | 0.005538 |
| serine (or cysteine) proteinase inhibitor, clade B (ovalbumin), member 7                                                                            | NM_003784 | 2.74 | 0.003429 |
| four jointed box 1 (Drosophila)                                                                                                                     | NM_014344 | 2.74 | 0.000207 |
| opioid growth factor receptor-like 1                                                                                                                | NM_024576 | 2.75 | 0.003979 |
| hairy and enhancer of split 1, (Drosophila)                                                                                                         | NM_005524 | 2.76 | 0.000009 |

|                                                                                                                                                                                                                                                    |           |      |          |
|----------------------------------------------------------------------------------------------------------------------------------------------------------------------------------------------------------------------------------------------------|-----------|------|----------|
| endothelial differentiation, sphingolipid G-protein-coupled receptor, 1                                                                                                                                                                            | NM_001400 | 2.78 | 0.003053 |
| caspase recruitment domain family, member 9                                                                                                                                                                                                        | NM_022352 | 2.79 | 0.000837 |
| Pre-B-cell leukemia transcription factor 1                                                                                                                                                                                                         | AL049381  | 2.81 | 0.002159 |
| microphthalmia-associated transcription factor                                                                                                                                                                                                     | NM_000248 | 2.83 | 0.000974 |
| interferon-induced protein with tetratricopeptide repeats 2                                                                                                                                                                                        | AA131041  | 2.83 | 0.031536 |
| hypothetical protein FLJ31166                                                                                                                                                                                                                      | BE301029  | 2.86 | 0.006563 |
| ST6 (alpha-N-acetyl-neuraminyl-2,3-beta-galactosyl-1,3)-N-acetylgalactosaminide alpha-2,6-sialyltransferase 5                                                                                                                                      | AF131837  | 2.88 | 0.000976 |
| phorbol-12-myristate-13-acetate-induced protein 1                                                                                                                                                                                                  | NM_021127 | 2.9  | 0.000931 |
| endothelial differentiation, sphingolipid G-protein-coupled receptor, 3                                                                                                                                                                            | AA534817  | 2.9  | 0.01875  |
| gb:AA167449 /DB_XREF=gi:1745836 /DB_XREF=zp08h11.s1 /CLONE=IMAGE:595845 /FEA=mRNA /CNT=416 /TID=Hs.83623.2 /TIER=Stack /STK=59 /UG=Hs.83623 /LL=9970 /UG_GENE=NR1I3 /UG_TITLE=nuclear receptor subfamily 1, group I, member 3                      | AA167449  | 2.93 | 0.000936 |
| hypothetical protein FLJ20245                                                                                                                                                                                                                      | NM_017723 | 2.97 | 0.001263 |
| T-box 3 (ulnar mammary syndrome)                                                                                                                                                                                                                   | NM_016569 | 2.97 | 0.001002 |
| spondin 2, extracellular matrix protein                                                                                                                                                                                                            | NM_012445 | 3.08 | 0.011901 |
| Leukocyte-derived arginine aminopeptidase                                                                                                                                                                                                          | BE889628  | 3.19 | 0.002461 |
| CARD only protein                                                                                                                                                                                                                                  | NM_052889 | 3.27 | 0.001887 |
| gremlin 1 homolog, cysteine knot superfamily (Xenopus laevis)                                                                                                                                                                                      | NM_013372 | 3.3  | 0.001674 |
| gb:AV646597 /DB_XREF=gi:9867611 /DB_XREF=AV646597 /CLONE=GLCAPB04 /FEA=EST /CNT=57 /TID=Hs.51615.0 /TIER=Stack /STK=34 /UG=Hs.51615 /UG_TITLE=ESTs, Weakly similar to ALU7_HUMAN ALU SUBFAMILY SQ SEQUENCE CONTAMINATION WARNING ENTRY (H.sapiens) | AV646597  | 3.34 | 0.000149 |
| gremlin 1 homolog, cysteine knot superfamily (Xenopus laevis)                                                                                                                                                                                      | AF154054  | 3.36 | 0.000019 |
| interferon-induced protein with tetratricopeptide repeats 3                                                                                                                                                                                        | AI075407  | 3.38 | 0.002065 |
| nidogen (enactin)                                                                                                                                                                                                                                  | BF940043  | 3.39 | 0.000113 |
| keratin 19                                                                                                                                                                                                                                         | NM_002276 | 3.4  | 0.001156 |
| nuclear receptor subfamily 2, group F, member 2                                                                                                                                                                                                    | AV703465  | 3.42 | 0.001717 |
| nuclear receptor subfamily 2, group F, member 2                                                                                                                                                                                                    | M64497    | 3.42 | 0.000041 |
| aldehyde dehydrogenase 1 family, member A1                                                                                                                                                                                                         | NM_000689 | 3.42 | 0.009298 |
| RNA binding motif protein 24                                                                                                                                                                                                                       | AI677701  | 3.45 | 0.000673 |
| coagulation factor II (thrombin) receptor-like 2                                                                                                                                                                                                   | AI378647  | 3.5  | 0.008675 |
| microphthalmia-associated transcription factor                                                                                                                                                                                                     | AL117653  | 3.52 | 0.0035   |
| gb:AV699347 /DB_XREF=gi:10301318 /DB_XREF=AV699347 /CLONE=GKCBPH07 /FEA=EST /CNT=18 /TID=Hs.83623.3 /TIER=Stack /STK=13 /UG=Hs.83623 /LL=9970 /UG_GENE=NR1I3 /UG_TITLE=nuclear receptor subfamily 1, group I, member 3                             | AV699347  | 3.57 | 0.000353 |

|                                                                                                                                                                                                                                 |           |      |          |
|---------------------------------------------------------------------------------------------------------------------------------------------------------------------------------------------------------------------------------|-----------|------|----------|
| oxytocin receptor                                                                                                                                                                                                               | NM_000916 | 3.62 | 0.000657 |
| nuclear receptor subfamily 2, group F, member 2                                                                                                                                                                                 | AL037401  | 3.62 | 0.00031  |
| neurofilament 3 (150kDa medium)                                                                                                                                                                                                 | NM_005382 | 3.65 | 0.000173 |
| ST6 (alpha-N-acetyl-neuraminyl-2,3-beta-galactosyl-1,3)-N-acetylgalactosaminide alpha-2,6-sialyltransferase 5 /// ST6 (alpha-N-acetyl-neuraminyl-2,3-beta-galactosyl-1,3)-N-acetylgalactosaminide alpha-2,6-sialyltransferase 5 | NM_030965 | 3.7  | 0.000038 |
| gb:AA628440 /DB_XREF=gi:2540827 /DB_XREF=af26f02.s1 /CLONE=IMAGE:1032795 /FEA=mRNA /CNT=416 /TID=Hs.83623.2 /TIER=Stack /STK=70 /UG=Hs.83623 /LL=9970 /UG_GENE=NR113 /UG_TITLE=nuclear receptor subfamily 1, group I, member 3  | AA628440  | 3.7  | 0.000227 |
| G protein-coupled receptor 126                                                                                                                                                                                                  | AL033377  | 3.71 | 0.001295 |
| mannan-binding lectin serine protease 1 (C4/C2 activating component of Ra-reactive factor)                                                                                                                                      | AI274095  | 3.75 | 0.00758  |
| cathepsin C                                                                                                                                                                                                                     | NM_001814 | 3.81 | 0.000301 |
| hypothetical protein FLJ11127                                                                                                                                                                                                   | NM_019018 | 3.81 | 0.000751 |
| 5-hydroxytryptamine (serotonin) receptor 2B                                                                                                                                                                                     | NM_000867 | 3.82 | 0.000725 |
| homeo box D10                                                                                                                                                                                                                   | AW299531  | 4.13 | 0.00142  |
| integrin, alpha 6                                                                                                                                                                                                               | NM_000210 | 4.18 | 0.000506 |
| forkhead box F1                                                                                                                                                                                                                 | NM_001451 | 4.3  | 0.002724 |
| neurofilament, light polypeptide 68kDa                                                                                                                                                                                          | AL537457  | 4.37 | 0.000028 |
| C-type lectin domain family 2, member B                                                                                                                                                                                         | BC005254  | 4.5  | 0.006642 |
| coagulation factor III (thromboplastin, tissue factor)                                                                                                                                                                          | NM_001993 | 4.58 | 0.003834 |
| response gene to complement 32                                                                                                                                                                                                  | NM_014059 | 4.59 | 0.014918 |
| gb:AW263497 /DB_XREF=gi:6640313 /DB_XREF=xn80a06.x1 /CLONE=IMAGE:2700754 /FEA=EST /CNT=6 /TID=Hs.97774.0 /TIER=ConsEnd /STK=3 /UG=Hs.97774 /UG_TITLE=ESTs                                                                       | AW263497  | 4.61 | 0.003856 |
| forkhead box L2                                                                                                                                                                                                                 | NM_023067 | 4.87 | 0.000092 |
| cathepsin C                                                                                                                                                                                                                     | AI246687  | 4.99 | 0.00003  |
| GATA binding protein 2                                                                                                                                                                                                          | AL563460  | 5.05 | 0.000409 |
| keratin 18                                                                                                                                                                                                                      | NM_000224 | 5.25 | 0.000168 |
| cathepsin C                                                                                                                                                                                                                     | AI246687  | 5.32 | 0.000084 |
| matrix metalloproteinase 1 (interstitial collagenase)                                                                                                                                                                           | NM_002421 | 5.81 | 0.000064 |
| matrix metalloproteinase 3 (stromelysin 1, progelatinase)                                                                                                                                                                       | NM_002422 | 6.17 | 0.000085 |
| somatostatin receptor 1                                                                                                                                                                                                         | R62424    | 6.19 | 0.001146 |

Supplementary Table 2: Lists of genes differentially expressed between bone Marrow MSCs and placenta MSCs.

| <b>Genes overexpressed in BMMSCs as compared to PIMSCs</b>                                                        |                     |                      |                |
|-------------------------------------------------------------------------------------------------------------------|---------------------|----------------------|----------------|
| <b>Gene name</b>                                                                                                  | <b>Accession Nb</b> | <b>Fold increase</b> | <b>P value</b> |
| cytochrome P450, family 1, subfamily B, polypeptide 1                                                             | NM_000104           | 7.73                 | 0.003322       |
| cytochrome P450, family 1, subfamily B, polypeptide 1                                                             | AU154504            | 6.75                 | 0.001555       |
| elastin (supravalvular aortic stenosis, Williams-Beuren syndrome)                                                 | AA479278            | 6.04                 | 0.000888       |
| cytochrome P450, family 1, subfamily B, polypeptide 1                                                             | AU144855            | 5.95                 | 0.000071       |
| proenkephalin                                                                                                     | NM_006211           | 5.87                 | 0.000088       |
| EGF-containing fibulin-like extracellular matrix protein 1                                                        | AI826799            | 5.76                 | 0.001122       |
| potassium channel tetramerisation domain containing 12                                                            | AI718937            | 5.58                 | 0.012338       |
| prostaglandin I2 (prostacyclin) synthase /// prostaglandin I2 (prostacyclin) synthase                             | NM_000961           | 5.56                 | 0.01359        |
| hyaluronan and proteoglycan link protein 1                                                                        | U43328              | 5.35                 | 0.000069       |
| tissue inhibitor of metalloproteinase 3 (Sorsby fundus dystrophy, pseudoinflammatory)                             | NM_000362           | 5.26                 | 0.000915       |
| iroquois homeobox protein 3                                                                                       | AI681917            | 5.23                 | 0.000791       |
| pentraxin-related gene, rapidly induced by IL-1 beta                                                              | NM_002852           | 5.22                 | 0.009695       |
| tissue inhibitor of metalloproteinase 3 (Sorsby fundus dystrophy, pseudoinflammatory)                             | BF347089            | 4.89                 | 0.000555       |
| filaggrin                                                                                                         | AL356504            | 4.85                 | 0.002765       |
| ribosomal protein S4, Y-linked 1                                                                                  | NM_001008           | 4.78                 | 0.004168       |
| UDP-N-acetyl-alpha-D-galactosamine:polypeptide N-acetylgalactosaminyltransferase 5 (GalNAc-T5)                    | AK022198            | 4.78                 | 0.006856       |
| ankyrin 3, node of Ranvier (ankyrin G)                                                                            | NM_020987           | 4.75                 | 0.006564       |
| tissue inhibitor of metalloproteinase 3 (Sorsby fundus dystrophy, pseudoinflammatory)                             | U67195              | 4.74                 | 0.000003       |
| phosphatidic acid phosphatase type 2B                                                                             | AV725664            | 4.74                 | 0.006599       |
| paired-like homeodomain transcription factor 2                                                                    | NM_000325           | 4.7                  | 0.001638       |
| Hyaluronan and proteoglycan link protein 1                                                                        | AU144114            | 4.7                  | 0.003921       |
| EGF-containing fibulin-like extracellular matrix protein 1                                                        | NM_004105           | 4.49                 | 0.000533       |
| fibronectin type III domain containing 1                                                                          | AI345957            | 4.4                  | 0.000158       |
| potassium channel tetramerisation domain containing 12 /// potassium channel tetramerisation domain containing 12 | AA551075            | 4.39                 | 0.003519       |
| CDNA: FLJ23131 fis, clone LNG08502                                                                                | AK026784            | 4.19                 | 0.00245        |
| receptor tyrosine kinase-like orphan receptor 1                                                                   | NM_005012           | 4.18                 | 0.010172       |

|                                                                                                                                                                                                                    |           |      |          |
|--------------------------------------------------------------------------------------------------------------------------------------------------------------------------------------------------------------------|-----------|------|----------|
| prostaglandin E synthase                                                                                                                                                                                           | NM_004878 | 4.1  | 0.000385 |
| paired related homeobox 2                                                                                                                                                                                          | NM_016307 | 4.1  | 0.000147 |
| keratin associated protein 1-1 /// keratin associated protein 1-1                                                                                                                                                  | NM_030967 | 4.1  | 0.00091  |
| tissue inhibitor of metalloproteinase 3 (Sorsby fundus dystrophy, pseudoinflammatory)                                                                                                                              | AW338933  | 4.09 | 0.001924 |
| integrin, beta-like 1 (with EGF-like repeat domains)                                                                                                                                                               | NM_004791 | 4.09 | 0.001551 |
| gb:AL359052.1 /DB_XREF=gi:8518175 /FEA=mRNA /CNT=13 /TID=Hs.311054.0 /TIER=ConsEnd /STK=5 /UG=Hs.311054 /DEF=Homo sapiens mRNA full length insert cDNA clone EUROIMAGE 1968422. /PROD=ITGBL1, integrin beta-like 1 | AL359052  | 4.04 | 0.003044 |
| Integrin, beta-like 1 (with EGF-like repeat domains)                                                                                                                                                               | AI753143  | 4.03 | 0.000777 |
| crystallin, alpha B                                                                                                                                                                                                | AF007162  | 4.01 | 0.001219 |
| importin 9                                                                                                                                                                                                         | AI659533  | 3.94 | 0.001105 |
| transforming growth factor, beta-induced, 68kDa                                                                                                                                                                    | NM_000358 | 3.93 | 0.010403 |
| aldehyde dehydrogenase 1 family, member A3                                                                                                                                                                         | NM_000693 | 3.9  | 0.004309 |
| GATA binding protein 6                                                                                                                                                                                             | D87811    | 3.84 | 0.003577 |
| microfibrillar associated protein 5                                                                                                                                                                                | AW665892  | 3.82 | 0.003055 |
| dapper homolog 1, antagonist of beta-catenin (xenopus)                                                                                                                                                             | NM_016651 | 3.82 | 0.007952 |
| CDNA FLJ31059 fis, clone HSYRA2000832                                                                                                                                                                              | AA418028  | 3.8  | 0.000001 |
| phosphatidic acid phosphatase type 2B                                                                                                                                                                              | AB000889  | 3.79 | 0.005991 |
| major histocompatibility complex, class II, DP alpha 1                                                                                                                                                             | M27487    | 3.78 | 0.002291 |
| hyaluronan and proteoglycan link protein 1                                                                                                                                                                         | NM_001884 | 3.75 | 0.000019 |
| hypothetical protein DKFZp434L142                                                                                                                                                                                  | AF260333  | 3.74 | 0.001039 |
| ABI gene family, member 3 (NESH) binding protein                                                                                                                                                                   | AB056106  | 3.72 | 0.000094 |
| UDP-N-acetyl-alpha-D-galactosamine:polypeptide N-acetylgalactosaminyltransferase 1 (GalNAc-T1)                                                                                                                     | BC038440  | 3.72 | 0.000437 |
| decorin                                                                                                                                                                                                            | AF138302  | 3.63 | 0.004041 |
| integrin, alpha 11                                                                                                                                                                                                 | AF109681  | 3.62 | 0.005288 |
| endothelial cell-specific molecule 1                                                                                                                                                                               | NM_007036 | 3.54 | 0.13248  |
| serine (or cysteine) proteinase inhibitor, clade E (nexin, plasminogen activator inhibitor type 1), member 2                                                                                                       | AL541302  | 3.52 | 0.024069 |
| cyclin-dependent kinase inhibitor 2B (p15, inhibits CDK4)                                                                                                                                                          | AW444761  | 3.5  | 0.001621 |
| supervillin                                                                                                                                                                                                        | NM_003174 | 3.49 | 0.001763 |
| gb:BF002195 /DB_XREF=gi:10702470 /DB_XREF=7h23h07.x1 /CLONE=IMAGE:3316861 /FEA=EST /CNT=8 /TID=Hs.131624.0 /TIER=ConsEnd /STK=6 /UG=Hs.131624 /UG_TITLE=ESTs                                                       | BF002195  | 3.49 | 0.000004 |
| UDP-N-acetyl-alpha-D-galactosamine:polypeptide N-acetylgalactosaminyltransferase 1 (GalNAc-T1)                                                                                                                     | AV692127  | 3.47 | 0.001518 |
| DEAD (Asp-Glu-Ala-Asp) box polypeptide 3, Y-linked                                                                                                                                                                 | NM_004660 | 3.47 | 0.002768 |
| aldo-keto reductase family 1, member C3 (3-alpha hydroxysteroid dehydrogenase, type II)                                                                                                                            | AB018580  | 3.45 | 0.026754 |

|                                                                                                                                     |           |      |          |
|-------------------------------------------------------------------------------------------------------------------------------------|-----------|------|----------|
| phosphatidic acid phosphatase type 2B                                                                                               | AA628586  | 3.43 | 0.002066 |
| microfibrillar associated protein 5                                                                                                 | AW665892  | 3.43 | 0.002064 |
| prostaglandin-endoperoxide synthase 2 (prostaglandin G/H synthase and cyclooxygenase)                                               | NM_000963 | 3.42 | 0.025127 |
| hypothetical protein LOC283824                                                                                                      | AI693140  | 3.42 | 0.049877 |
| decorin                                                                                                                             | AF138300  | 3.41 | 0.001438 |
| decorin                                                                                                                             | AF138303  | 3.39 | 0.001012 |
| hypothetical protein FLJ14054                                                                                                       | NM_024563 | 3.39 | 0.036858 |
| UDP-N-acetyl-alpha-D-galactosamine:polypeptide N-acetylgalactosaminyltransferase 1 (GalNAc-T1)                                      | U41514    | 3.37 | 0.000708 |
| ectonucleotide pyrophosphatase/phosphodiesterase 2 (autotaxin)                                                                      | L35594    | 3.35 | 0.000112 |
| CDNA clone IMAGE:4152983, partial cds                                                                                               | BF344237  | 3.31 | 0.000021 |
| vascular cell adhesion molecule 1                                                                                                   | NM_001078 | 3.29 | 0.000728 |
| tumor protein D52-like 1                                                                                                            | NM_003287 | 3.25 | 0.016412 |
| KIAA0746 protein                                                                                                                    | AB018289  | 3.25 | 0.005595 |
| dehydrogenase/reductase (SDR family) member 3                                                                                       | NM_004753 | 3.21 | 0.00583  |
| insulin-like growth factor binding protein 2, 36kDa                                                                                 | NM_000597 | 3.21 | 0.000488 |
| Homo sapiens, clone IMAGE:4794726, mRNA                                                                                             | BF513121  | 3.2  | 0.005868 |
| gb:AW964972 /DB_XREF=gi:8154808 /DB_XREF=EST377045 /FEA=EST /CNT=66 /TID=Hs.48516.1 /TIER=Stack /STK=50 /UG=Hs.48516 /UG_TITLE=ESTs | AW964972  | 3.2  | 0.000353 |
| hemacentin                                                                                                                          | BF446673  | 3.2  | 0.001169 |
| pregnancy-associated plasma protein A, pappalysin 1                                                                                 | BF107618  | 3.18 | 0.001288 |
| UDP-N-acetyl-alpha-D-galactosamine:polypeptide N-acetylgalactosaminyltransferase 1 (GalNAc-T1)                                      | NM_020474 | 3.17 | 0.002355 |
| chondroitin sulfate proteoglycan 2 (versican)                                                                                       | BF218922  | 3.17 | 0.017853 |
| SMAD, mothers against DPP homolog 6 (Drosophila)                                                                                    | NM_005585 | 3.16 | 0.003863 |
| cartilage oligomeric matrix protein                                                                                                 | NM_000095 | 3.15 | 0.001844 |
| lysyl oxidase                                                                                                                       | L16895    | 3.15 | 0.022313 |
| pregnancy-associated plasma protein A, pappalysin 1                                                                                 | BF107618  | 3.15 | 0.002958 |
| serine/threonine kinase 38 like                                                                                                     | AW779556  | 3.14 | 0.014126 |
| EGF, latrophilin and seven transmembrane domain containing 1                                                                        | NM_022159 | 3.14 | 0.013261 |
| ankyrin repeat domain 1 (cardiac muscle)                                                                                            | NM_014391 | 3.13 | 0.032685 |
| Similar to circumsporozoite protein precursor - Plasmodium brasilianum                                                              | H10408    | 3.13 | 0.00286  |
| adducin 3 (gamma)                                                                                                                   | NM_019903 | 3.11 | 0.005088 |
| decorin                                                                                                                             | AI281593  | 3.11 | 0.004863 |
| microfibrillar associated protein 5                                                                                                 | U37283    | 3.11 | 0.000945 |
| chondroitin sulfate proteoglycan 2 (versican)                                                                                       | NM_004385 | 3.1  | 0.01905  |

|                                                                                                                                                                          |           |      |          |
|--------------------------------------------------------------------------------------------------------------------------------------------------------------------------|-----------|------|----------|
| solute carrier family 14 (urea transporter), member 1 (Kidd blood group)                                                                                                 | NM_015865 | 3.1  | 0.00001  |
| adducin 3 (gamma)                                                                                                                                                        | AI763123  | 3.09 | 0.000066 |
| adducin 3 (gamma)                                                                                                                                                        | AI818488  | 3.07 | 0.003946 |
| pregnancy-associated plasma protein A, pappalysin 1                                                                                                                      | AI110886  | 3.07 | 0.004067 |
| ankylosis, progressive homolog (mouse)                                                                                                                                   | AA854943  | 3.04 | 0.000857 |
| placental growth factor, vascular endothelial growth factor-related protein                                                                                              | BC001422  | 3.02 | 0.003553 |
| adducin 3 (gamma)                                                                                                                                                        | BE545756  | 3.01 | 0.000401 |
| Solute carrier family 14 (urea transporter), member 1 (Kidd blood group)                                                                                                 | BE673587  | 3.01 | 0.000977 |
| ATP-binding cassette, sub-family A (ABC1), member 8                                                                                                                      | NM_007168 | 2.99 | 0.000622 |
| early B-cell factor 3                                                                                                                                                    | AL354950  | 2.99 | 0.00078  |
| prostaglandin E synthase                                                                                                                                                 | AF010316  | 2.96 | 0.000405 |
| lumican                                                                                                                                                                  | NM_002345 | 2.94 | 0.007545 |
| chemokine (C-X-C motif) ligand 12 (stromal cell-derived factor 1)                                                                                                        | U19495    | 2.94 | 0.03488  |
| chitinase 3-like 1 (cartilage glycoprotein-39)                                                                                                                           | M80927    | 2.92 | 0.083965 |
| KIAA1199                                                                                                                                                                 | AB033025  | 2.92 | 0.021069 |
| Forkhead box C2 (MFH-1, mesenchyme forkhead 1)                                                                                                                           | BF446723  | 2.92 | 0.001247 |
| CD74 antigen (invariant polypeptide of major histocompatibility complex, class II antigen-associated)                                                                    | K01144    | 2.91 | 0.001428 |
| KIAA0367                                                                                                                                                                 | AB002365  | 2.91 | 0.000141 |
| v-maf musculoaponeurotic fibrosarcoma oncogene homolog (avian)                                                                                                           | AF055376  | 2.9  | 0.000137 |
| insulin-like growth factor binding protein 3                                                                                                                             | BF340228  | 2.9  | 0.000304 |
| jagged 1 (Alagille syndrome)                                                                                                                                             | U73936    | 2.88 | 0.002697 |
| chromosome 7 open reading frame 10                                                                                                                                       | NM_024728 | 2.87 | 0.000623 |
| Full-length cDNA clone CS0DD009YB17 of Neuroblastoma Cot 50-normalized of Homo sapiens (human)                                                                           | AK000776  | 2.87 | 0.000056 |
| SMAD, mothers against DPP homolog 6 (Drosophila)                                                                                                                         | AI193899  | 2.86 | 0.002294 |
| Fibronectin 1                                                                                                                                                            | AI333596  | 2.86 | 0.001827 |
| procollagen C-endopeptidase enhancer 2                                                                                                                                   | NM_013363 | 2.85 | 0.00025  |
| jagged 1 (Alagille syndrome)                                                                                                                                             | U77914    | 2.84 | 0.000002 |
| UDP-N-acetyl-alpha-D-galactosamine:polypeptide N-acetylgalactosaminyltransferase 5 (GalNAc-T5)                                                                           | AI633503  | 2.84 | 0.000042 |
| similar to expressed sequence AI593442                                                                                                                                   | H24398    | 2.84 | 0.00141  |
| interleukin 6 (interferon, beta 2)                                                                                                                                       | NM_000600 | 2.83 | 0.000275 |
| pregnancy-associated plasma protein A, pappalysin 1                                                                                                                      | BG434272  | 2.81 | 0.000003 |
| chondroitin sulfate proteoglycan 2 (versican) /// chondroitin sulfate proteoglycan 2 (versican)                                                                          | R94644    | 2.79 | 0.002415 |
| gb:AW044286 /DB_XREF=gi:5904815 /DB_XREF=vv67c06.x1 /CLONE=IMAGE:2534602 /FEA=EST /CNT=19 /TID=Hs.174134.2 /TIER=Stack /STK=18 /UG=Hs.174134 /LL=51204 /UG_GENE=LOC51204 | AW044286  | 2.79 | 0.000927 |

|                                                                                             |           |      |          |
|---------------------------------------------------------------------------------------------|-----------|------|----------|
| /UG_TITLE=clone HQ0477 PRO0477p                                                             |           |      |          |
| latrophilin 2                                                                               | NM_012302 | 2.78 | 0.003297 |
| chitinase 3-like 1 (cartilage glycoprotein-39)                                              | M80927    | 2.78 | 0.08551  |
| putative small membrane protein NID67                                                       | AF313413  | 2.78 | 0.016162 |
| Collagen, type VIII, alpha 1                                                                | AL359062  | 2.78 | 0.001695 |
| DEP domain containing 6                                                                     | NM_022783 | 2.77 | 0.000692 |
| Hyaluronan and proteoglycan link protein 1                                                  | AI760252  | 2.75 | 0.000486 |
| kelch-like 13 (Drosophila)                                                                  | AB037730  | 2.73 | 0.004358 |
| cadherin 6, type 2, K-cadherin (fetal kidney)                                               | AU151483  | 2.72 | 0.000662 |
| pregnancy-associated plasma protein A, pappalysin 1                                         | AA148534  | 2.71 | 0.000262 |
| stanniocalcin 2                                                                             | AI435828  | 2.71 | 0.00133  |
| CD24 antigen (small cell lung carcinoma cluster 4 antigen)                                  | AK000168  | 2.71 | 0.016751 |
| Ubiquitin specific protease 9, Y-linked (fat facets-like, Drosophila)                       | AV681765  | 2.7  | 0.010913 |
| zinc finger protein 423                                                                     | AW149417  | 2.68 | 0.007633 |
| Kruppel-like factor 4 (gut)                                                                 | BF514079  | 2.68 | 0.001744 |
| transforming growth factor, beta receptor I (activin A receptor type II-like kinase, 53kDa) | AA604375  | 2.68 | 0.01058  |
| hypothetical gene supported by BC009385                                                     | AL520272  | 2.68 | 0.000025 |
| chromosome 5 open reading frame 13                                                          | NM_004772 | 2.66 | 0.016683 |
| CDNA FLJ44429 fis, clone UTERU2015653                                                       | AI088063  | 2.66 | 0.00277  |
| Homo sapiens, clone IMAGE:4837650, mRNA, partial cds                                        | AI862542  | 2.66 | 0.000036 |
| hypothetical LOC389048                                                                      | BG285837  | 2.66 | 0.008768 |
| insulin-like growth factor binding protein 3                                                | M31159    | 2.65 | 0.006836 |
| collagen triple helix repeat containing 1                                                   | AA584310  | 2.65 | 0.000233 |
| LIM domain only 2 (rhombotin-like 1)                                                        | NM_005574 | 2.64 | 0.002421 |
| heat shock 27kDa protein family, member 7 (cardiovascular)                                  | NM_014424 | 2.64 | 0.003171 |
| core 1 synthase, glycoprotein-N-acetylgalactosamine 3-beta-galactosyltransferase, 1         | NM_020156 | 2.64 | 0.006474 |
| glutaminase                                                                                 | NM_014905 | 2.61 | 0.000804 |
| fibronectin 1                                                                               | X02761    | 2.61 | 0.021412 |
| fibronectin 1                                                                               | AF130095  | 2.6  | 0.021926 |
| chondroitin sulfate proteoglycan 2 (versican)                                               | BF590263  | 2.59 | 0.025301 |
| Full-length cDNA clone CS0DI014YH21 of Placenta Cot 25-normalized of Homo sapiens (human)   | BF058422  | 2.59 | 0.030234 |
| cytoglobin                                                                                  | AL513673  | 2.59 | 0.000052 |
| biglycan /// serologically defined colon cancer antigen 33                                  | AA845258  | 2.58 | 0.027342 |
| CDNA FLJ26539 fis, clone KDN09310                                                           | AW025579  | 2.57 | 0.027809 |



|                                                                                                                                                              |           |      |          |
|--------------------------------------------------------------------------------------------------------------------------------------------------------------|-----------|------|----------|
| netrin 4                                                                                                                                                     | AF278532  | 2.57 | 0.005984 |
| fibroblast growth factor 7 (keratinocyte growth factor)                                                                                                      | NM_002009 | 2.56 | 0.032277 |
| fibronectin 1 /// fibronectin 1                                                                                                                              | BC005858  | 2.56 | 0.022104 |
| fibronectin 1                                                                                                                                                | AK026737  | 2.56 | 0.021662 |
| ankyrin repeat domain 29                                                                                                                                     | AI307802  | 2.56 | 0.000808 |
| periostin, osteoblast specific factor                                                                                                                        | AY140646  | 2.56 | 0.005378 |
| heme oxygenase (decycling) 1                                                                                                                                 | NM_002133 | 2.55 | 0.000054 |
| CD24 antigen (small cell lung carcinoma cluster 4 antigen)                                                                                                   | L33930    | 2.55 | 0.009463 |
| BMP and activin membrane-bound inhibitor                                                                                                                     | NM_012342 | 2.54 | 0.0016   |
| ependymin related protein 1 (zebrafish)                                                                                                                      | BC000686  | 2.53 | 0.000081 |
| gb:AA954994 /DB_XREF=gi:3118689 /DB_XREF=op24f03.s1 /CLONE=IMAGE:1577789 /FEA=EST /CNT=15 /TID=Hs.237396.1 /TIER=ConsEnd /STK=1 /UG=Hs.237396 /UG_TITLE=ESTs | AA954994  | 2.52 | 0.000399 |
| EGF-like repeats and discoidin I-like domains 3                                                                                                              | AA053711  | 2.51 | 0.030477 |
| Glypican 6                                                                                                                                                   | AI651255  | 2.5  | 0.034156 |
| glutaminase                                                                                                                                                  | AF097493  | 2.49 | 0.000005 |
| CD24 antigen (small cell lung carcinoma cluster 4 antigen)                                                                                                   | AA761181  | 2.48 | 0.004905 |
| complement factor H /// complement factor H-related 1                                                                                                        | X56210    | 2.48 | 0.005899 |
| biglycan                                                                                                                                                     | BC002416  | 2.47 | 0.035548 |
| lysyl oxidase                                                                                                                                                | NM_002317 | 2.46 | 0.006742 |
| Full length insert cDNA clone ZD77F06                                                                                                                        | AI655611  | 2.45 | 0.000456 |
| zinc finger protein 503                                                                                                                                      | AA603467  | 2.45 | 0.00164  |
| hypothetical protein FLJ38725                                                                                                                                | AI659800  | 2.45 | 0.000979 |
| periostin, osteoblast specific factor                                                                                                                        | AY140646  | 2.45 | 0.004691 |
| Ifapsoriasis                                                                                                                                                 | BC029685  | 2.45 | 0.004666 |
| phosphoglucomutase 1                                                                                                                                         | NM_002633 | 2.44 | 0.000839 |
| protein phosphatase 1, regulatory (inhibitor) subunit 3C                                                                                                     | N26005    | 2.43 | 0.000283 |
| phospholipase A2, group IVA (cytosolic, calcium-dependent)                                                                                                   | M68874    | 2.43 | 0.005079 |
| NACHT, leucine rich repeat and PYD (pyrin domain) containing 1                                                                                               | NM_021730 | 2.43 | 0.009505 |
| major histocompatibility complex, class II, DR beta 1                                                                                                        | AJ297586  | 2.42 | 0.000434 |
| ankyrin 2, neuronal                                                                                                                                          | BF726212  | 2.41 | 0.013105 |
| EPH receptor A3                                                                                                                                              | AF213459  | 2.4  | 0.003771 |
| interferon-induced protein 44                                                                                                                                | NM_006417 | 2.4  | 0.000148 |
| fibronectin 1                                                                                                                                                | AJ276395  | 2.4  | 0.000259 |
| LOC440156                                                                                                                                                    | BE738279  | 2.39 | 0.000071 |

|                                                                                                                                                                                                                                                                                                       |           |      |          |
|-------------------------------------------------------------------------------------------------------------------------------------------------------------------------------------------------------------------------------------------------------------------------------------------------------|-----------|------|----------|
| secretory protein LOC284013                                                                                                                                                                                                                                                                           | AA977975  | 2.38 | 0.000602 |
| Jagged 1 (Alagille syndrome)                                                                                                                                                                                                                                                                          | AI457817  | 2.36 | 0.002169 |
| gb:AB020690.1 /DB_XREF=gi:4240254 /GEN=KIAA0883 /FEA=FLmRNA /CNT=85 /TID=Hs.7782.0 /TIER=FL+Stack /STK=20 /UG=Hs.7782 /LL=10687 /DEF=Homo sapiens mRNA for KIAA0883 protein, complete cds. /PROD=KIAA0883 protein /FL=gb:NM_007257.1 gb:AB020690.1 gb:AF286487.1                                      | AB020690  | 2.35 | 0.002511 |
| aggrecan 1 (chondroitin sulfate proteoglycan 1, large aggregating proteoglycan, antigen identified by monoclonal antibody A0122)                                                                                                                                                                      | NM_013227 | 2.34 | 0.000363 |
| Ras association (RalGDS/AF-6) and pleckstrin homology domains 1                                                                                                                                                                                                                                       | AA194149  | 2.34 | 0.03458  |
| hypothetical protein FLJ14834                                                                                                                                                                                                                                                                         | AW084730  | 2.34 | 0.015983 |
| gap junction protein, alpha 1, 43kDa (connexin 43)                                                                                                                                                                                                                                                    | NM_000165 | 2.33 | 0.001489 |
| hyaluronan synthase 1                                                                                                                                                                                                                                                                                 | NM_001523 | 2.33 | 0.00013  |
| lysyl oxidase-like 3                                                                                                                                                                                                                                                                                  | AI917716  | 2.33 | 0.000034 |
| Hyaluronan synthase 2                                                                                                                                                                                                                                                                                 | AI374739  | 2.33 | 0.133892 |
| aldo-keto reductase family 1, member C2 (dihydrodiol dehydrogenase 2; bile acid binding protein; 3-alpha hydroxysteroid dehydrogenase, type III) /// aldo-keto reductase family 1, member C2 (dihydrodiol dehydrogenase 2; bile acid binding protein; 3-alpha hydroxysteroid dehydrogenase, type III) | M33376    | 2.32 | 0.012668 |
| natriuretic peptide receptor C/guanylate cyclase C (atrionatriuretic peptide receptor C)                                                                                                                                                                                                              | AI628360  | 2.32 | 0.006188 |
| tumor necrosis factor, alpha-induced protein 3                                                                                                                                                                                                                                                        | NM_006290 | 2.31 | 0.034927 |
| hephaestin                                                                                                                                                                                                                                                                                            | NM_014799 | 2.31 | 0.000294 |
| growth arrest-specific 1                                                                                                                                                                                                                                                                              | NM_002048 | 2.3  | 0.000025 |
| KIAA1671 protein                                                                                                                                                                                                                                                                                      | AB051458  | 2.3  | 0.00827  |
| Transcribed locus                                                                                                                                                                                                                                                                                     | BG236273  | 2.3  | 0.000147 |
| nicotinamide N-methyltransferase                                                                                                                                                                                                                                                                      | NM_006169 | 2.29 | 0.005685 |
| connective tissue growth factor                                                                                                                                                                                                                                                                       | M92934    | 2.29 | 0.056539 |
| hepatocyte growth factor (hepapoietin A; scatter factor)                                                                                                                                                                                                                                              | X16323    | 2.29 | 0.039711 |
| vascular endothelial growth factor                                                                                                                                                                                                                                                                    | AF022375  | 2.29 | 0.002075 |
| LOC440156                                                                                                                                                                                                                                                                                             | AL530703  | 2.29 | 0.008098 |
| midline 1 (Opitz/BBB syndrome)                                                                                                                                                                                                                                                                        | NM_000381 | 2.28 | 0.009283 |
| adiponutrin                                                                                                                                                                                                                                                                                           | AK025665  | 2.27 | 0.000306 |
| chromosome 10 open reading frame 116                                                                                                                                                                                                                                                                  | NM_006829 | 2.26 | 0.036518 |
| cell cycle progression 1                                                                                                                                                                                                                                                                              | NM_004748 | 2.26 | 0.015605 |
| nicotinamide N-methyltransferase                                                                                                                                                                                                                                                                      | NM_006169 | 2.23 | 0.0096   |
| special AT-rich sequence binding protein 1 (binds to nuclear matrix/scaffold-associating DNA's)                                                                                                                                                                                                       | NM_002971 | 2.23 | 0.000248 |
| phosphodiesterase 4D interacting protein (myomegalin)                                                                                                                                                                                                                                                 | AB042557  | 2.23 | 0.012388 |
| periostin, osteoblast specific factor                                                                                                                                                                                                                                                                 | D13665    | 2.22 | 0.005131 |

|                                                                                                                                                                                                                                                             |           |      |          |
|-------------------------------------------------------------------------------------------------------------------------------------------------------------------------------------------------------------------------------------------------------------|-----------|------|----------|
| glutathione peroxidase 7                                                                                                                                                                                                                                    | AA406605  | 2.22 | 0.001401 |
| fibronectin 1                                                                                                                                                                                                                                               | AJ276395  | 2.22 | 0.000166 |
| Plexin A4                                                                                                                                                                                                                                                   | AL117427  | 2.22 | 0.001217 |
| insulin-like growth factor binding protein 4                                                                                                                                                                                                                | NM_001552 | 2.21 | 0.023921 |
| chondroitin sulfate proteoglycan 2 (versican)                                                                                                                                                                                                               | D32039    | 2.21 | 0.00362  |
| frizzled homolog 8 (Drosophila)                                                                                                                                                                                                                             | AW340311  | 2.21 | 0.084024 |
| MRNA; cDNA DKFZp313C0240 (from clone DKFZp313C0240)                                                                                                                                                                                                         | H16409    | 2.21 | 0.00106  |
| EPH receptor A5                                                                                                                                                                                                                                             | BE218107  | 2.21 | 0.00208  |
| Core 1 synthase, glycoprotein-N-acetylgalactosamine 3-beta-galactosyltransferase, 1                                                                                                                                                                         | AI672489  | 2.18 | 0.024178 |
| scinderin                                                                                                                                                                                                                                                   | NM_033128 | 2.18 | 0.000882 |
| 4-aminobutyrate aminotransferase                                                                                                                                                                                                                            | AF237813  | 2.16 | 0.006358 |
| enabled homolog (Drosophila)                                                                                                                                                                                                                                | NM_018212 | 2.14 | 0.007709 |
| Doublecortin and CaM kinase-like 1                                                                                                                                                                                                                          | AI129626  | 2.13 | 0.005105 |
| reversion-inducing-cysteine-rich protein with kazal motifs                                                                                                                                                                                                  | NM_021111 | 2.12 | 0.013573 |
| gb:BF221547 /DB_XREF=gi:11128724 /DB_XREF=7o69f05.x1 /CLONE=IMAGE:3579416 /FEA=EST /CNT=54 /TID=Hs.16578.0 /TIER=Stack /STK=31 /UG=Hs.16578 /UG_TITLE=ESTs                                                                                                  | BF221547  | 2.12 | 0.02871  |
| Xg blood group (pseudoautosomal boundary-divided on the X chromosome)                                                                                                                                                                                       | AF380356  | 2.12 | 0.005557 |
| stanniocalcin 2                                                                                                                                                                                                                                             | BC000658  | 2.11 | 0.000104 |
| cadherin 11, type 2, OB-cadherin (osteoblast)                                                                                                                                                                                                               | D21254    | 2.11 | 0.008236 |
| Similar to CG9996-PA                                                                                                                                                                                                                                        | AI004009  | 2.11 | 0.002424 |
| microtubule-associated protein 1B                                                                                                                                                                                                                           | AA554833  | 2.11 | 0.004541 |
| cytokine receptor-like factor 1                                                                                                                                                                                                                             | NM_004750 | 2.1  | 0.00021  |
| transmembrane, prostate androgen induced RNA                                                                                                                                                                                                                | AL035541  | 2.1  | 0.034116 |
| KIAA1644 protein                                                                                                                                                                                                                                            | BF516072  | 2.09 | 0.000149 |
| serine (or cysteine) proteinase inhibitor, clade F (alpha-2 antiplasmin, pigment epithelium derived factor), member 1                                                                                                                                       | NM_002615 | 2.08 | 0.013844 |
| meningioma (disrupted in balanced translocation) 1                                                                                                                                                                                                          | NM_002430 | 2.08 | 0.001493 |
| gb:NM_021647.1 /DB_XREF=gi:11067364 /GEN=KIAA0626 /FEA=FLmRNA /CNT=50 /TID=Hs.178121.0 /TIER=FL+Stack /STK=20 /UG=Hs.178121 /LL=9848 /DEF=Homo sapiens KIAA0626 gene product (KIAA0626), mRNA. /PROD=KIAA0626 gene product /FL=gb:AB014526.1 gb:NM_021647.1 | NM_021647 | 2.08 | 0.005642 |
| Transcribed locus                                                                                                                                                                                                                                           | BF513800  | 2.08 | 0.004004 |
| KIAA1102 protein                                                                                                                                                                                                                                            | AK026815  | 2.07 | 0.004642 |
| tumor differentially expressed 2-like                                                                                                                                                                                                                       | AA872583  | 2.07 | 0.01738  |
| Ras association (RalGDS/AF-6) and pleckstrin homology domains 1                                                                                                                                                                                             | AA194149  | 2.07 | 0.017083 |

|                                                                                                                                        |           |      |          |
|----------------------------------------------------------------------------------------------------------------------------------------|-----------|------|----------|
| glycerol-3-phosphate acyltransferase, mitochondrial                                                                                    | AB046780  | 2.07 | 0.000705 |
| pleckstrin and Sec7 domain containing 3                                                                                                | NM_015310 | 2.06 | 0.003508 |
| WAP four-disulfide core domain 1                                                                                                       | NM_021197 | 2.06 | 0.003962 |
| Homo sapiens, Similar to HERV-H LTR-associating 3, clone IMAGE:4830680, mRNA                                                           | BC031956  | 2.06 | 0.014378 |
| leukemia inhibitory factor (cholinergic differentiation factor)                                                                        | NM_002309 | 2.05 | 0.00309  |
| Transcribed locus                                                                                                                      | AI761573  | 2.05 | 0.023009 |
| keratin associated protein 1-5                                                                                                         | AJ406928  | 2.05 | 0.004435 |
| selenoprotein P, plasma, 1                                                                                                             | NM_005410 | 2.04 | 0.004461 |
| interleukin 1 receptor, type I                                                                                                         | NM_000877 | 2.04 | 0.009638 |
| eukaryotic translation initiation factor 1A, Y-linked                                                                                  | BC005248  | 2.04 | 0.006878 |
| clusterin (complement lysis inhibitor, SP-40,40, sulfated glycoprotein 2, testosterone-repressed prostate message 2, apolipoprotein J) | AI982754  | 2.03 | 0.029207 |
| Serine (or cysteine) proteinase inhibitor, clade E (nexin, plasminogen activator inhibitor type 1), member 2                           | AA703280  | 2.03 | 0.008867 |
| family with sequence similarity 43, member A                                                                                           | AW264102  | 2.02 | 0.032255 |
| Similar to Ras suppressor protein 1 (Rsu-1) (RSP-1)                                                                                    | AW167298  | 2.02 | 0.007415 |
| Hypothetical protein LOC201895                                                                                                         | AI824013  | 2.01 | 0.016648 |
| phosphodiesterase 7B                                                                                                                   | AI638433  | 2.01 | 0.00081  |
| aldehyde dehydrogenase 1 family, member L2                                                                                             | AI654224  | 2.01 | 0.091881 |
| Collagen, type XII, alpha 1                                                                                                            | AU146651  | 2.01 | 0.018747 |
| similar to AVLV472                                                                                                                     | BC021680  | 2.01 | 0.001958 |
| midline 1 (Opitz/BBB syndrome)                                                                                                         | BE967532  | 2    | 0.015403 |
| aldo-keto reductase family 1, member C1 (dihydrodiol dehydrogenase 1; 20-alpha (3-alpha)-hydroxysteroid dehydrogenase)                 | NM_001353 | 2    | 0.033326 |
| bone morphogenetic protein 1                                                                                                           | NM_001199 | 2    | 0.001788 |
| docking protein 1, 62kDa (downstream of tyrosine kinase 1)                                                                             | AF035299  | 2    | 0.001049 |
| Similar to CG9996-PA                                                                                                                   | AW025980  | 2    | 0.000307 |

| <b>Genes overexpressed in PI-MSCs as compared to BM-MSCs</b>                                         |                     |                      |                |
|------------------------------------------------------------------------------------------------------|---------------------|----------------------|----------------|
| <b>Gene name</b>                                                                                     | <b>Accession Nb</b> | <b>Fold increase</b> | <b>P value</b> |
| membrane metallo-endopeptidase (neutral endopeptidase, enkephalinase, CALLA, CD10)                   | AI433463            | 2                    | 0.043038       |
| thyrotropin-releasing hormone degrading ectoenzyme                                                   | NM_013381           | 2                    | 0.012203       |
| S100 calcium binding protein A4 (calcium protein, calvasculin, metastasin, murine placental homolog) | NM_002961           | 2.01                 | 0.040158       |
| ZW10 interactor                                                                                      | NM_007057           | 2.01                 | 0.000487       |
| family with sequence similarity 54, member A                                                         | AL138828            | 2.02                 | 0.00618        |
| fatty acid binding protein 4, adipocyte                                                              | NM_001442           | 2.04                 | 0.008839       |
| monoglyceride lipase                                                                                 | BG168471            | 2.04                 | 0.026765       |
| chromosome 20 open reading frame 129                                                                 | BC001068            | 2.04                 | 0.000062       |
| Transcribed locus                                                                                    | BF476403            | 2.06                 | 0.00691        |
| MCM7 minichromosome maintenance deficient 7 ( <i>S. cerevisiae</i> )                                 | D55716              | 2.08                 | 0.000384       |
| hypothetical protein FLJ10156                                                                        | BC005004            | 2.08                 | 0.007833       |
| kinesin family member 2C                                                                             | U63743              | 2.09                 | 0.000788       |
| putative homeodomain transcription factor 2                                                          | AL136883            | 2.09                 | 0.001359       |
| chromosome 8 open reading frame 4                                                                    | NM_020130           | 2.09                 | 0.057571       |
| spindle pole body component 25 homolog ( <i>S. cerevisiae</i> )                                      | AF225416            | 2.1                  | 0.000726       |
| geminin, DNA replication inhibitor                                                                   | NM_015895           | 2.1                  | 0.000739       |
| asp (abnormal spindle)-like, microcephaly associated ( <i>Drosophila</i> )                           | NM_018123           | 2.1                  | 0.019218       |
| tetraspanin 5 /// tetraspanin 5                                                                      | AF065389            | 2.11                 | 0.000351       |
| exocyst complex component 7                                                                          | AK023832            | 2.12                 | 0.021592       |
| cell division cycle associated 7 /// cell division cycle associated 7                                | AY029179            | 2.13                 | 0.010939       |
| Integrin, alpha 2 (CD49B, alpha 2 subunit of VLA-2 receptor)                                         | N95414              | 2.13                 | 0.050357       |
| deiodinase, iodothyronine, type II                                                                   | NM_013989           | 2.14                 | 0.009561       |
| PDZ and LIM domain 1 (elfin)                                                                         | BC000915            | 2.14                 | 0.000945       |
| collagen, type XIII, alpha 1                                                                         | M33653              | 2.14                 | 0.009877       |
| apolipoprotein B mRNA editing enzyme, catalytic polypeptide-like 3B                                  | NM_004900           | 2.15                 | 0.003126       |
| MCM10 minichromosome maintenance deficient 10 ( <i>S. cerevisiae</i> )                               | AL136840            | 2.15                 | 0.010126       |
| FERM domain containing 4A                                                                            | AW515645            | 2.15                 | 0.005929       |
| aminoacylase 1-like 2                                                                                | AI654133            | 2.15                 | 0.018617       |
| calponin 1, basic, smooth muscle                                                                     | NM_001299           | 2.16                 | 0.001544       |
| monoglyceride lipase /// monoglyceride lipase                                                        | BC006230            | 2.16                 | 0.036158       |

|                                                                                                                             |           |      |          |
|-----------------------------------------------------------------------------------------------------------------------------|-----------|------|----------|
| phorbol-12-myristate-13-acetate-induced protein 1                                                                           | AI857639  | 2.19 | 0.0392   |
| retinoic acid receptor responder (tazarotene induced) 2                                                                     | BC000069  | 2.19 | 0.005615 |
| tetraspanin 14 /// tetraspanin 14                                                                                           | NM_030927 | 2.19 | 0.000176 |
| hypothetical protein MGC11324 /// hypothetical protein MGC11324                                                             | BC006236  | 2.19 | 0.013253 |
| aldehyde oxidase 1                                                                                                          | NM_001159 | 2.2  | 0.018708 |
| insulin receptor substrate 2                                                                                                | BF700086  | 2.22 | 0.000439 |
| hypothetical protein LOC146909                                                                                              | AA292789  | 2.22 | 0.000495 |
| hypothetical LOC387763                                                                                                      | AW276078  | 2.22 | 0.075617 |
| suppressor of cytokine signaling 1                                                                                          | AB005043  | 2.23 | 0.065338 |
| adaptor-related protein complex 1, sigma 2 subunit                                                                          | AF251295  | 2.24 | 0.000603 |
| hairy and enhancer of split 1, (Drosophila)                                                                                 | BE973687  | 2.24 | 0.003404 |
| agrin                                                                                                                       | AK021586  | 2.24 | 0.039404 |
| CD44 antigen (homing function and Indian blood group system)                                                                | AV700298  | 2.25 | 0.014558 |
| sal-like 1 (Drosophila)                                                                                                     | AU152837  | 2.25 | 0.04414  |
| interleukin 11                                                                                                              | NM_000641 | 2.27 | 0.225316 |
| PHD finger protein 19                                                                                                       | BE544837  | 2.27 | 0.005938 |
| neurexin 3                                                                                                                  | NM_004796 | 2.28 | 0.002698 |
| leucine rich repeat containing 17                                                                                           | NM_005824 | 2.29 | 0.000143 |
| KIAA0186 gene product                                                                                                       | NM_021067 | 2.29 | 0.002548 |
| guanylate binding protein 3                                                                                                 | AL136680  | 2.29 | 0.012075 |
| hypothetical protein MGC45871                                                                                               | AI961778  | 2.29 | 0.000279 |
| BH-protocadherin (brain-heart)                                                                                              | NM_002589 | 2.3  | 0.043911 |
| E2F transcription factor 7                                                                                                  | AI341146  | 2.3  | 0.021306 |
| ribonucleotide reductase M2 polypeptide                                                                                     | BC001886  | 2.32 | 0.000006 |
| regeneration associated muscle protease                                                                                     | AI671186  | 2.32 | 0.005964 |
| homeo box A11                                                                                                               | H94842    | 2.33 | 0.007392 |
| transcription factor 19 (SC1)                                                                                               | BC002493  | 2.33 | 0.007071 |
| churchill domain containing 1                                                                                               | BE568660  | 2.34 | 0.013767 |
| CDNA clone IMAGE:6025865, partial cds                                                                                       | AA156240  | 2.35 | 0.006482 |
| Homo sapiens, clone IMAGE:4865533, mRNA                                                                                     | AA622837  | 2.35 | 0.005141 |
| CDC20 cell division cycle 20 homolog (S. cerevisiae)                                                                        | NM_001255 | 2.36 | 0.001543 |
| interferon-induced protein with tetratricopeptide repeats 1 /// interferon-induced protein with tetratricopeptide repeats 1 | NM_001548 | 2.36 | 0.062663 |
| glycoprotein hormones, alpha polypeptide                                                                                    | NM_000735 | 2.36 | 0.011827 |

|                                                                                                                                                                                                                          |           |      |          |
|--------------------------------------------------------------------------------------------------------------------------------------------------------------------------------------------------------------------------|-----------|------|----------|
| Pre-B-cell leukemia transcription factor 1                                                                                                                                                                               | AL049381  | 2.36 | 0.002676 |
| collagen, type VII, alpha 1 (epidermolysis bullosa, dystrophic, dominant and recessive)                                                                                                                                  | NM_000094 | 2.38 | 0.052994 |
| solute carrier family 7 (cationic amino acid transporter, y+ system), member 2                                                                                                                                           | AA876372  | 2.39 | 0.006668 |
| elastin microfibril interfacier 2 /// elastin microfibril interfacier 2                                                                                                                                                  | AF270513  | 2.41 | 0.000444 |
| tumor necrosis factor (ligand) superfamily, member 4 (tax-transcriptionally activated glycoprotein 1, 34kDa)                                                                                                             | NM_003326 | 2.42 | 0.001132 |
| agrin                                                                                                                                                                                                                    | AW008051  | 2.42 | 0.015497 |
| Hypothetical protein MGC16121                                                                                                                                                                                            | AA234096  | 2.45 | 0.018547 |
| ribonucleotide reductase M2 polypeptide                                                                                                                                                                                  | BE966236  | 2.46 | 0.00395  |
| chromosome 1 open reading frame 24                                                                                                                                                                                       | AF288391  | 2.46 | 0.026045 |
| interferon-induced protein with tetratricopeptide repeats 2                                                                                                                                                              | AA131041  | 2.47 | 0.023634 |
| renin                                                                                                                                                                                                                    | NM_000537 | 2.49 | 0.095929 |
| microphthalmia-associated transcription factor                                                                                                                                                                           | NM_000248 | 2.49 | 0.013075 |
| odd-skipped related 2 (Drosophila)                                                                                                                                                                                       | AI811298  | 2.49 | 0.00935  |
| endothelial cell adhesion molecule                                                                                                                                                                                       | AL573851  | 2.49 | 0.003023 |
| hypothetical protein MGC45871                                                                                                                                                                                            | BG036514  | 2.49 | 0.002966 |
| Chromosome 6 open reading frame 155                                                                                                                                                                                      | BE500942  | 2.5  | 0.054195 |
| hairy and enhancer of split 1, (Drosophila)                                                                                                                                                                              | NM_005524 | 2.51 | 0.003673 |
| glutathione S-transferase theta 1                                                                                                                                                                                        | NM_000853 | 2.51 | 0.015623 |
| hypothetical protein MGC16121                                                                                                                                                                                            | BE048571  | 2.51 | 0.010197 |
| transcription factor AP-2 alpha (activating enhancer binding protein 2 alpha)                                                                                                                                            | BF343007  | 2.52 | 0.000221 |
| Dedicator of cytokinesis 2                                                                                                                                                                                               | AI991459  | 2.53 | 0.032687 |
| heat shock 70kDa protein 2                                                                                                                                                                                               | U56725    | 2.54 | 0.000369 |
| aldehyde dehydrogenase 1 family, member A1                                                                                                                                                                               | NM_000689 | 2.54 | 0.008716 |
| uridine phosphorylase 1                                                                                                                                                                                                  | NM_003364 | 2.57 | 0.014326 |
| KIAA1912 protein                                                                                                                                                                                                         | AI376433  | 2.57 | 0.001454 |
| glutaredoxin (thioltransferase)                                                                                                                                                                                          | AF162769  | 2.59 | 0.006341 |
| gb:AV699565 /DB_XREF=gi:10301536 /DB_XREF=AV699565 /CLONE=GKCDPD06 /FEA=EST /CNT=9 /TID=Hs.128065.0 /TIER=Stack /STK=9 /UG=Hs.128065 /UG_TITLE=ESTs                                                                      | AV699565  | 2.59 | 0.01084  |
| glutaredoxin (thioltransferase)                                                                                                                                                                                          | NM_002064 | 2.6  | 0.000033 |
| gb:AW139393 /DB_XREF=gi:6144111 /DB_XREF=UI-H-BI1-adq-c-06-0-UI.s1 /CLONE=IMAGE:2717578 /FEA=EST /CNT=14 /TID=Hs.62954.2 /TIER=Stack /STK=11 /UG=Hs.62954 /LL=2495 /UG_GENE=FTH1 /UG_TITLE=ferritin, heavy polypeptide 1 | AW139393  | 2.62 | 0.005458 |
| endothelial differentiation, sphingolipid G-protein-coupled receptor, 3                                                                                                                                                  | AA534817  | 2.66 | 0.007023 |
| L1 cell adhesion molecule                                                                                                                                                                                                | AI653981  | 2.69 | 0.007091 |

|                                                                                                                                                                                                                                                                                                                                               |           |      |          |
|-----------------------------------------------------------------------------------------------------------------------------------------------------------------------------------------------------------------------------------------------------------------------------------------------------------------------------------------------|-----------|------|----------|
| KIAA1576 protein                                                                                                                                                                                                                                                                                                                              | AA156723  | 2.69 | 0.000073 |
| hypothetical protein FLJ31166                                                                                                                                                                                                                                                                                                                 | BE301029  | 2.69 | 0.002464 |
| stathmin-like 3                                                                                                                                                                                                                                                                                                                               | AL353715  | 2.71 | 0.000026 |
| opioid growth factor receptor-like 1                                                                                                                                                                                                                                                                                                          | NM_024576 | 2.73 | 0.00142  |
| T-box 3 (ulnar mammary syndrome)                                                                                                                                                                                                                                                                                                              | AI806338  | 2.74 | 0.017697 |
| hypothetical LOC388610                                                                                                                                                                                                                                                                                                                        | AA037766  | 2.76 | 0.001549 |
| ST6 (alpha-N-acetyl-neuraminyl-2,3-beta-galactosyl-1,3)-N-acetylgalactosaminide alpha-2,6-sialyltransferase 5                                                                                                                                                                                                                                 | AF131837  | 2.76 | 0.001248 |
| caspase recruitment domain family, member 9                                                                                                                                                                                                                                                                                                   | NM_022352 | 2.82 | 0.002695 |
| four jointed box 1 (Drosophila)                                                                                                                                                                                                                                                                                                               | NM_014344 | 2.83 | 0.001324 |
| stanniocalcin 1                                                                                                                                                                                                                                                                                                                               | AI300520  | 2.84 | 0.068788 |
| caspase 1, apoptosis-related cysteine protease (interleukin 1, beta, convertase) /// CARD only protein<br>gb:AA167449 /DB_XREF=gi:1745836 /DB_XREF=zp08h11.s1 /CLONE=IMAGE:595845 /FEA=mRNA<br>/CNT=416 /TID=Hs.83623.2 /TIER=Stack /STK=59 /UG=Hs.83623 /LL=9970 /UG_GENE=NR113<br>/UG_TITLE=nuclear receptor subfamily 1, group I, member 3 | AA167449  | 2.86 | 0.006462 |
| spondin 2, extracellular matrix protein                                                                                                                                                                                                                                                                                                       | NM_012445 | 2.9  | 0.042509 |
| stanniocalcin 1                                                                                                                                                                                                                                                                                                                               | NM_003155 | 2.92 | 0.080725 |
| endothelial differentiation, sphingolipid G-protein-coupled receptor, 1                                                                                                                                                                                                                                                                       | NM_001400 | 2.97 | 0.00961  |
| T-box 3 (ulnar mammary syndrome)                                                                                                                                                                                                                                                                                                              | NM_016569 | 3    | 0.00039  |
| phorbol-12-myristate-13-acetate-induced protein 1                                                                                                                                                                                                                                                                                             | NM_021127 | 3.01 | 0.03227  |
| Stanniocalcin 1                                                                                                                                                                                                                                                                                                                               | AW003173  | 3.08 | 0.061071 |
| keratin 19                                                                                                                                                                                                                                                                                                                                    | NM_002276 | 3.11 | 0.002516 |
| serine (or cysteine) proteinase inhibitor, clade B (ovalbumin), member 7                                                                                                                                                                                                                                                                      | NM_003784 | 3.14 | 0.00069  |
| interleukin 8                                                                                                                                                                                                                                                                                                                                 | NM_000584 | 3.18 | 0.101279 |
| interferon-induced protein with tetratricopeptide repeats 3                                                                                                                                                                                                                                                                                   | AI075407  | 3.18 | 0.002086 |
| nuclear receptor subfamily 2, group F, member 2                                                                                                                                                                                                                                                                                               | M64497    | 3.2  | 0.000033 |
| hypothetical protein FLJ20245                                                                                                                                                                                                                                                                                                                 | NM_017723 | 3.22 | 0.003132 |
| gremlin 1 homolog, cysteine knot superfamily (Xenopus laevis)                                                                                                                                                                                                                                                                                 | NM_013372 | 3.23 | 0.008174 |
| Leukocyte-derived arginine aminopeptidase                                                                                                                                                                                                                                                                                                     | BE889628  | 3.29 | 0.001786 |
| nuclear receptor subfamily 2, group F, member 2                                                                                                                                                                                                                                                                                               | AV703465  | 3.34 | 0.001321 |
| CARD only protein                                                                                                                                                                                                                                                                                                                             | NM_052889 | 3.34 | 0.002268 |
| nidogen (enactin)                                                                                                                                                                                                                                                                                                                             | BF940043  | 3.37 | 0.001398 |
| microphthalmia-associated transcription factor                                                                                                                                                                                                                                                                                                | AL117653  | 3.37 | 0.005324 |
| gremlin 1 homolog, cysteine knot superfamily (Xenopus laevis)                                                                                                                                                                                                                                                                                 | AF154054  | 3.38 | 0.002796 |



|                                                                                                                                                                                                                                                    |           |      |          |
|----------------------------------------------------------------------------------------------------------------------------------------------------------------------------------------------------------------------------------------------------|-----------|------|----------|
| gb:AV646597 /DB_XREF=gi:9867611 /DB_XREF=AV646597 /CLONE=GLCAPB04 /FEA=EST /CNT=57 /TID=Hs.51615.0 /TIER=Stack /STK=34 /UG=Hs.51615 /UG_TITLE=ESTs, Weakly similar to ALU7_HUMAN ALU SUBFAMILY SQ SEQUENCE CONTAMINATION WARNING ENTRY (H.sapiens) | AV646597  | 3.38 | 0.0012   |
| 5-hydroxytryptamine (serotonin) receptor 2B                                                                                                                                                                                                        | NM_000867 | 3.39 | 0.033249 |
| nuclear receptor subfamily 2, group F, member 2                                                                                                                                                                                                    | AL037401  | 3.39 | 0.000131 |
| gb:AV699347 /DB_XREF=gi:10301318 /DB_XREF=AV699347 /CLONE=GKCBPH07 /FEA=EST /CNT=18 /TID=Hs.83623.3 /TIER=Stack /STK=13 /UG=Hs.83623 /LL=9970 /UG_GENE=NR1I3 /UG_TITLE=nuclear receptor subfamily 1, group I, member 3                             | AV699347  | 3.5  | 0.003178 |
| coagulation factor II (thrombin) receptor-like 2                                                                                                                                                                                                   | AI378647  | 3.54 | 0.003659 |
| RNA binding motif protein 24                                                                                                                                                                                                                       | AI677701  | 3.55 | 0.001578 |
| ST6 (alpha-N-acetyl-neuraminyl-2,3-beta-galactosyl-1,3)-N-acetylgalactosaminide alpha-2,6-sialyltransferase 5 /// ST6 (alpha-N-acetyl-neuraminyl-2,3-beta-galactosyl-1,3)-N-acetylgalactosaminide alpha-2,6-sialyltransferase 5                    | NM_030965 | 3.56 | 0.000061 |
| G protein-coupled receptor 126                                                                                                                                                                                                                     | AL033377  | 3.57 | 0.00181  |
| neurofilament, light polypeptide 68kDa                                                                                                                                                                                                             | AL537457  | 3.58 | 0.000169 |
| integrin, alpha 6                                                                                                                                                                                                                                  | NM_000210 | 3.66 | 0.000904 |
| oxytocin receptor                                                                                                                                                                                                                                  | NM_000916 | 3.71 | 0.00264  |
| cathepsin C                                                                                                                                                                                                                                        | NM_001814 | 3.72 | 0.00023  |
| neurofilament 3 (150kDa medium)                                                                                                                                                                                                                    | NM_005382 | 3.72 | 0.004978 |
| gb:AA628440 /DB_XREF=gi:2540827 /DB_XREF=af26f02.s1 /CLONE=IMAGE:1032795 /FEA=mRNA /CNT=416 /TID=Hs.83623.2 /TIER=Stack /STK=70 /UG=Hs.83623 /LL=9970 /UG_GENE=NR1I3 /UG_TITLE=nuclear receptor subfamily 1, group I, member 3                     | AA628440  | 3.74 | 0.000585 |
| hypothetical protein FLJ11127                                                                                                                                                                                                                      | NM_019018 | 3.9  | 0.000907 |
| gb:AW263497 /DB_XREF=gi:6640313 /DB_XREF=xn80a06.x1 /CLONE=IMAGE:2700754 /FEA=EST /CNT=6 /TID=Hs.97774.0 /TIER=ConsEnd /STK=3 /UG=Hs.97774 /UG_TITLE=ESTs                                                                                          | AW263497  | 3.95 | 0.006195 |
| mannan-binding lectin serine protease 1 (C4/C2 activating component of Ra-reactive factor)                                                                                                                                                         | AI274095  | 3.96 | 0.000703 |
| homeo box D10                                                                                                                                                                                                                                      | AW299531  | 3.97 | 0.004488 |
| response gene to complement 32                                                                                                                                                                                                                     | NM_014059 | 4.33 | 0.003356 |
| forkhead box L2                                                                                                                                                                                                                                    | NM_023067 | 4.61 | 0.008719 |
| C-type lectin domain family 2, member B                                                                                                                                                                                                            | BC005254  | 4.62 | 0.006846 |
| coagulation factor III (thromboplastin, tissue factor)                                                                                                                                                                                             | NM_001993 | 4.65 | 0.005223 |
| forkhead box F1                                                                                                                                                                                                                                    | NM_001451 | 4.65 | 0.000769 |
| cathepsin C                                                                                                                                                                                                                                        | AI246687  | 4.93 | 0        |
| GATA binding protein 2                                                                                                                                                                                                                             | AL563460  | 4.98 | 0.000233 |
| keratin 18                                                                                                                                                                                                                                         | NM_000224 | 5.02 | 0.000215 |

|                                                           |           |      |          |
|-----------------------------------------------------------|-----------|------|----------|
| cathepsin C                                               | AI246687  | 5.1  | 0.000003 |
| somatostatin receptor 1                                   | R62424    | 6.12 | 0.000808 |
| matrix metalloproteinase 1 (interstitial collagenase)     | NM_002421 | 6.7  | 0.003352 |
| matrix metalloproteinase 3 (stromelysin 1, progelatinase) | NM_002422 | 6.74 | 0.006758 |

Supplementary Table 3. List of genes involved in developmental processes over-expressed in Mb-MSC compares to BM-MSC.

|                                       | Fold increase |
|---------------------------------------|---------------|
| Tbox3                                 | 2.97          |
| Gremlin 1                             | 3.3           |
| Homeobox D10                          | 4.13          |
| Nuclear receptor subfamily 2, group F | 3.42          |
| Forkhead Box F1                       | 4.3           |
| Agrin                                 | 2.14          |
| Oxytocin receptor                     | 3.62          |
| Hes1                                  | 2.76          |

Supplementary Table 4. List of genes involved in adhesion and matrix interaction over-expressed in BM-MSC compare to Mb-MSC

|                                 | Fold increase |
|---------------------------------|---------------|
| CD24                            | 2.23          |
| Aggrecan                        | 2,27          |
| BMP1                            | 2.1           |
| Cadherin11                      | 2.17          |
| CXCL12                          | 3.11          |
| Connective tissue growth factor | 2.3           |
| Integrin alpha11                | 3.48          |
| Integrin alpha6                 |               |
| Integrin beta-like 1            | 3.91          |
| Frizzled                        | 2.03          |
| VCAM1                           | 3.59          |
| Jagged1                         | 2.66          |

### **Supplementary Figure 1: Workflow of MSCs isolation**

After retrieval of placenta and membrane, tissues were minced into small pieces of less than 1mm<sup>2</sup> and incubated for 1h in collagenase, hyalluronidase, dispase and DNase as described in Materials and methods. Mononucleated cells were then isolated using Ficoll gradient. 2 million cells were plated in MSCs media. 1 million of cells were stained for MSCs sorting on SORP FACS Aria 2. Sorted cells were plated on MSCs media. After p=4 all the cells were analyzed for MSCs markers expression and transcriptomic analysis.

### **Supplementary Figure 2: Comprehensive analysis of MSCs markers on freshly isolated cells from the amniotic membrane.**

Cells were stained with mouse anti human CD45-Amcyan, CD34-FITC, CD29-APC-CY7, CD90-AF700, CD73-PE, CD105-AF647.

After FSC-A/SSC-A selection, only CD45<sup>-</sup> and CD34<sup>-</sup> cells were considered.

We analyzed the expression of the different markers in the freshly isolated cells from the amniotic membrane. We demonstrate that the CD73<sup>+</sup> CD105<sup>+</sup> population was quite homogenous expressing also CD29 and CD90. The CD29<sup>-</sup> CD90<sup>-</sup> was also a homogenous population containing mostly CD73<sup>-</sup> CD105<sup>-</sup> cells. The other cell populations were quite heterogenous in the distribution of the different MSCs markers.

### **Supplementary Figure 3: PI/Mb-MSCs constitute a very homogenous population after 4 passages**

Exemple of MSCs marker expression of Mb-MSCs. After cell sorting of the different cell populations. We allowed the cells to grow in the MSC media as defined in materials and methods. We then performed after 4 passages flow cytometry analysis of the adherent cells. We can see that there is a quite homogenous population of cells negative for CD45 and CD34 but positive for CD90, CD29, CD73 and CD105. The same results were obtained for all sub-populations sorted previously (data not shown).

**Supplementary Figure 4: Immunofluorescence staining of placenta and membrane derived MSCs.**

Marker expression of cells derived from placenta and membrane analyzed by FACs were also analyzed by immunofluorescence staining. As in FACs staining cells were positive for CD90, CD29, CD73, CD105, and negative for CD34 and CD45.

**Supplementary Table 1: Lists of genes differentially expressed between bone Marrow MSCs and fetal membrane MSCs.**

**Supplementary Table 2: Lists of genes differentially expressed between bone Marrow MSCs and placenta MSCs.**

**Supplementary Table 3 . List of genes involved in developmental processes over-expressed in Mb-MSC compares to BM-MSC.**

**Supplementary Table 4. List of genes involved in adhesion and matrix interaction over-expressed in BM-MSC compare to Mb-MSC.**
